# Supplementary material for: An intercomparison of satellite, airborne, and ground-level observations with WRF–CAMx simulations of NO 2 columns over Houston, Texas, during the September 2021 TRACER-AQ campaign
Source: Copernicus journal article supplement (doi:10.5194/acp-24-6719-2024), 2024-06-10
Supplement: Supplementary file 1 [file acp-24-6719-2024-supplement.pdf]

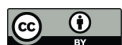

*Supplement of*

**An intercomparison of satellite, airborne, and ground-level observations with WRF–CAMx simulations of NO<sub>2</sub> columns over Houston, Texas, during the September 2021 TRACER-AQ campaign**

**M. Omar Nawaz et al.**

*Correspondence to:* M. Omar Nawaz ([nawaz.muhammad@email.gwu.edu](mailto:nawaz.muhammad@email.gwu.edu))

The copyright of individual parts of the supplement might differ from the article licence.

## Section S1. Supplementary Tables and Figures

Table S1: WRF physics options and data sources

| WRF Option            | Option Selected                                                        |
|-----------------------|------------------------------------------------------------------------|
| Analysis Data         | 0.25° GDAS (IC/BCs and analysis nudging on the 36 and 12 km domains)   |
| Microphysics          | Thompson                                                               |
| Longwave Radiation    | Rapid Radiative Transfer Model (RRTMG)                                 |
| Shortwave Radiation   | RRTMG                                                                  |
| Surface Layer Physics | Revised MM5 surface layer scheme                                       |
| LSM                   | Noah                                                                   |
| PBL scheme            | Yonsei University (YSU)                                                |
| Cumulus scheme        | Multi-Scale Kain-Fritsch (MSKF) on 36/12 km; none for 4/1.333/0.444 km |

Table S2: Vertical layer mapping from WRF to CAMx

| WRF Layer No. | WRF Eta Level | WRF Layer Pressure (mb) | WRF Layer Top (m) | CAMx Layer No. | CAMx Layer Top (m) | CAMx Layer Thickness (m) |
|---------------|---------------|-------------------------|-------------------|----------------|--------------------|--------------------------|
| 44            | 0.000         | 50.00                   | 20576             |                |                    |                          |
| 43            | 0.010         | 59.63                   | 19458             |                |                    |                          |
| 42            | 0.025         | 74.08                   | 18082             | 30             | 18082              | 3885                     |
| 41            | 0.045         | 93.35                   | 16616             |                |                    |                          |
| 40            | 0.065         | 112.61                  | 15427             |                |                    |                          |
| 39            | 0.090         | 136.69                  | 14198             | 29             | 14198              | 2977                     |
| 38            | 0.115         | 160.77                  | 13169             |                |                    |                          |
| 37            | 0.145         | 189.67                  | 12120             |                |                    |                          |
| 36            | 0.175         | 218.57                  | 11221             | 28             | 11221              | 1850                     |
| 35            | 0.210         | 252.28                  | 10304             |                |                    |                          |
| 34            | 0.250         | 290.81                  | 9372              | 27             | 9372               | 1599                     |
| 33            | 0.290         | 329.34                  | 8534              |                |                    |                          |
| 32            | 0.330         | 367.87                  | 7773              | 26             | 7773               | 1269                     |
| 31            | 0.370         | 406.40                  | 7073              |                |                    |                          |
| 30            | 0.405         | 440.12                  | 6504              | 25             | 6504               | 1040                     |
| 29            | 0.440         | 473.83                  | 5969              |                |                    |                          |
| 28            | 0.475         | 507.54                  | 5464              | 24             | 5464               | 870                      |
| 27            | 0.510         | 541.26                  | 4985              |                |                    |                          |
| 26            | 0.540         | 570.16                  | 4594              | 23             | 4594               | 737                      |
| 25            | 0.570         | 599.05                  | 4219              |                |                    |                          |
| 24            | 0.600         | 627.95                  | 3857              | 22             | 3857               | 684                      |
| 23            | 0.630         | 656.85                  | 3509              |                |                    |                          |
| 22            | 0.660         | 685.75                  | 3174              | 21             | 3174               | 325                      |
| 21            | 0.690         | 714.64                  | 2849              | 20             | 2849               | 314                      |
| 20            | 0.720         | 743.54                  | 2535              | 19             | 2535               | 304                      |
| 19            | 0.750         | 772.44                  | 2231              | 18             | 2231               | 247                      |
| 18            | 0.775         | 796.52                  | 1984              | 17             | 1984               | 241                      |
| 17            | 0.800         | 820.60                  | 1744              | 16             | 1744               | 235                      |
| 16            | 0.825         | 844.68                  | 1509              | 15             | 1509               | 230                      |
| 15            | 0.850         | 868.76                  | 1279              | 14             | 1279               | 135                      |
| 14            | 0.865         | 883.21                  | 1144              | 13             | 1144               | 134                      |
| 13            | 0.880         | 897.66                  | 1010              | 12             | 1010               | 132                      |
| 12            | 0.895         | 912.11                  | 878               | 11             | 878                | 130                      |
| 11            | 0.910         | 926.56                  | 748               | 10             | 748                | 86                       |
| 10            | 0.920         | 936.19                  | 662               | 9              | 662                | 85                       |
| 9             | 0.930         | 945.82                  | 577               | 8              | 577                | 84                       |

|         |       |         |     |   |     |    |
|---------|-------|---------|-----|---|-----|----|
| 8       | 0.940 | 955.46  | 493 | 7 | 493 | 84 |
| 7       | 0.950 | 965.09  | 409 | 6 | 409 | 83 |
| 6       | 0.960 | 974.72  | 326 | 5 | 326 | 82 |
| 5       | 0.970 | 984.35  | 243 | 4 | 243 | 82 |
| 4       | 0.980 | 993.99  | 162 | 3 | 162 | 81 |
| 3       | 0.990 | 1003.62 | 81  | 2 | 81  | 48 |
| 2       | 0.996 | 1009.40 | 32  | 1 | 32  | 32 |
| 1       | 0.998 | 1011.32 | 16  |   |     |    |
| surface | 1.000 | 1013.25 | 0   | 0 | 0   |    |

20 **Table S3: Science options for the CAMx simulation**

| Science Options                       | CAMx Configuration                                                                            |
|---------------------------------------|-----------------------------------------------------------------------------------------------|
| Version                               | Version 7.20                                                                                  |
| Time Zone                             | CST                                                                                           |
| Vertical Grid Mesh                    | 30 Layers with 32 m deep surface layer and 15 layers in the lowest 1.5 km                     |
| Horizontal Grids                      | 2-way nested grids with spacings of 1.333 and 0.444 km                                        |
| Meteorology                           | 2021 WRF meteorology                                                                          |
| Chemistry Mechanism                   | CB6r5 gas-phase mechanism                                                                     |
| Chemistry Solver                      | EBI                                                                                           |
| Probing Tool                          | Ozone Source Apportionment Technology (OSAT)                                                  |
| Photolysis Rates                      | TUV version 4.8 with TOMS ozone column adjustment and in-line adjustment for clouds           |
| Advection Scheme                      | Piecewise Parabolic Method (PPM)                                                              |
| Planetary Boundary Layer (PBL) mixing | K-theory with KV100 patch to enhance vertical mixing over urban areas within the lowest 100 m |
| In-line Ix Emissions On               | Inorganic iodine (Ix) emissions from saltwater areas                                          |
| Parallelization                       | MPI (18 threads) and OMP (6 threads)                                                          |

**Table S4: Major energy generation units in and around Houston, TX and their monthly NO<sub>x</sub> emissions**

| Number | Energy Generation Unit            | NO <sub>x</sub> (tons/month) |
|--------|-----------------------------------|------------------------------|
| 1      | Air Liquide Bayport Complex       | 570.7                        |
| 2      | Cedar Bayou                       | 73.0                         |
| 3      | W A Parish                        | 34.7                         |
| 4      | Odyssey Energy Altura Cogen, LLC  | 34.6                         |
| 5      | Texas City Cogeneration           | 30.8                         |
| 6      | Pasadena Power Plant              | 27.4                         |
| 7      | Channelview Cogeneration Facility | 25.9                         |
| 8      | Deer Park Energy Center           | 25.0                         |
| 9      | South Houston Green Power Site    | 25.0                         |
| 10     | TH Wharton                        | 18.1                         |
| 11     | Greens Bayou                      | 11.6                         |

25

**Table S5: Comparison of observed (OBS) and simulated (WRF) wind direction and associated statistics. Red shading indicates days with limited GCAS observations due to cloud coverage. The statistical measures of mean bias error (MBE), mean absolute error (MAE), and Pearson-R squared ( $R^2$ ) are computed using the astropy circular statistics python module (<https://docs.astropy.org/en/stable/stats/circ.html>).**

| Date            | WRF Dir (°) | OBS Dir (°) | $R^2$ | MBE   | MAE  | N    |
|-----------------|-------------|-------------|-------|-------|------|------|
| 09/01           | 184.0       | 180.0       | 0.04  | -1.0  | 36.0 | 130  |
| 09/03           | 136.0       | 185.0       | -0.04 | -49.0 | 60.0 | 137  |
| 09/08           | 13.0        | 17.0        | 0.57  | -10.0 | 29.0 | 137  |
| 09/09           | 20.0        | 37.0        | 0.78  | -11.0 | 24.0 | 149  |
| 09/10           | 81.0        | 75.0        | 0.38  | 6.0   | 17.0 | 149  |
| 09/11           | 89.0        | 92.0        | 0.68  | -3.0  | 14.0 | 151  |
| 09/23           | 63.0        | 88.0        | 0.3   | -24.0 | 28.0 | 118  |
| 09/24           | 87.0        | 97.0        | 0.47  | -8.0  | 20.0 | 137  |
| 09/25           | 70.0        | 59.0        | 0.57  | 9.0   | 24.0 | 114  |
| 09/26           | 97.0        | 96.0        | 0.8   | 0.0   | 19.0 | 117  |
| All Days        | 82.0        | 87.0        | 0.76  | -8.0  | 26.0 | 1339 |
| Not Cloudy Days | 67.0        | 73.0        | 0.73  | -5.0  | 21.0 | 1072 |

30

**Table S6: Comparison of observed (OBS) and simulated (WRF) wind speed and associated statistics. Red shading indicates days with limited GCAS observations due to cloud coverage. The statistical measures of mean bias error (MBE), mean absolute error (MAE), and Pearson-R squared ( $R^2$ ) are defined at the end of this supplement in section S2.**

35

| Date            | WRF Spd (m/s) | OBS Spd (m/s) | $R^2$ | MBE   | MAE  | N    |
|-----------------|---------------|---------------|-------|-------|------|------|
| 09/01           | 3.47          | 2.93          | 0.07  | 0.55  | 1.51 | 145  |
| 09/03           | 3.46          | 3.17          | 0.0   | 0.29  | 1.8  | 151  |
| 09/08           | 3.46          | 2.79          | 0.1   | 0.68  | 1.25 | 150  |
| 09/09           | 3.7           | 3.76          | 0.23  | -0.06 | 0.94 | 152  |
| 09/10           | 4.6           | 4.69          | 0.5   | -0.09 | 0.98 | 149  |
| 09/11           | 4.11          | 5.04          | 0.32  | -0.93 | 1.35 | 151  |
| 09/23           | 3.14          | 3.2           | 0.2   | -0.06 | 1.17 | 130  |
| 09/24           | 3.32          | 3.77          | 0.41  | -0.45 | 0.96 | 142  |
| 09/25           | 2.73          | 2.66          | 0.25  | 0.07  | 0.94 | 135  |
| 09/26           | 3.1           | 3.29          | 0.36  | -0.2  | 0.99 | 131  |
| All Days        | 3.53          | 3.55          | 0.26  | -0.02 | 1.2  | 1436 |
| Not Cloudy Days | 3.55          | 3.68          | 0.37  | -0.13 | 1.08 | 1140 |

40

**Table S7: Comparison of observed (OBS) and simulated (WRF) temperature and associated statistics. Red shading indicates days with limited GCAS observations due to cloud coverage. The statistical measures of mean bias error (MBE), mean absolute error (MAE), and Pearson-R squared ( $R^2$ ) are defined at the end of this supplement in section S2.**

| Date            | WRF Temp (K) | OBS Temp (K) | $R^2$ | MBE   | MAE  | N    |
|-----------------|--------------|--------------|-------|-------|------|------|
| 09/01           | 305.5        | 304.2        | 0.0   | 1.3   | 2.28 | 159  |
| 09/03           | 305.0        | 303.0        | 0.0   | 1.99  | 2.61 | 158  |
| 09/08           | 304.5        | 304.1        | 0.75  | 0.42  | 1.16 | 160  |
| 09/09           | 305.1        | 304.4        | 0.78  | 0.66  | 1.15 | 160  |
| 09/10           | 303.1        | 303.2        | 0.76  | -0.1  | 0.93 | 158  |
| 09/11           | 302.5        | 302.3        | 0.74  | 0.18  | 0.99 | 157  |
| 09/23           | 298.4        | 298.6        | 0.69  | -0.26 | 1.14 | 147  |
| 09/24           | 299.2        | 299.3        | 0.72  | -0.11 | 1.02 | 150  |
| 09/25           | 299.5        | 299.9        | 0.81  | -0.33 | 1.02 | 148  |
| 09/26           | 300.0        | 300.1        | 0.69  | -0.02 | 1.18 | 150  |
| All Days        | 302.4        | 302.0        | 0.71  | 0.39  | 1.35 | 1547 |
| Not Cloudy Days | 301.6        | 301.5        | 0.86  | 0.06  | 1.07 | 1230 |

45

**Table S8: Comparison of observed (OBS) and simulated (WRF) water vapor mixing ratio (WVMR) and associated statistics. Red shading indicates days with limited GCAS observations due to cloud coverage. The statistical measures of mean bias error (MBE), mean absolute error (MAE), and Pearson-R squared ( $R^2$ ) are defined at the end of this supplement in section S2.**

| Date            | WRF WVMR (g/kg) | OBS WVMR (g/kg) | $R^2$ | MBE   | MAE  | N   |
|-----------------|-----------------|-----------------|-------|-------|------|-----|
| 09/01           | 17.5            | 19.4            | 0.26  | -1.92 | 1.97 | 99  |
| 09/03           | 17.7            | 18.6            | 0.21  | -0.88 | 1.22 | 98  |
| 09/08           | 12.3            | 12.2            | 0.78  | 0.09  | 1.31 | 100 |
| 09/09           | 10.7            | 13.8            | 0.28  | -3.07 | 3.11 | 100 |
| 09/10           | 9.1             | 10.7            | 0.67  | -1.51 | 1.6  | 98  |
| 09/11           | 10.6            | 12.6            | 0.21  | -2.03 | 2.28 | 97  |
| 09/23           | 6.0             | 7.6             | 0.54  | -1.55 | 1.58 | 97  |
| 09/24           | 7.4             | 8.8             | 0.32  | -1.34 | 1.46 | 100 |
| 09/25           | 8.2             | 9.7             | 0.54  | -1.51 | 1.53 | 98  |
| 09/26           | 10.8            | 11.6            | 0.48  | -0.76 | 0.87 | 100 |
| All Days        | 11.1            | 12.5            | 0.85  | -1.45 | 1.69 | 987 |
| Not Cloudy Days | 9.4             | 10.9            | 0.64  | -1.46 | 1.72 | 790 |

50

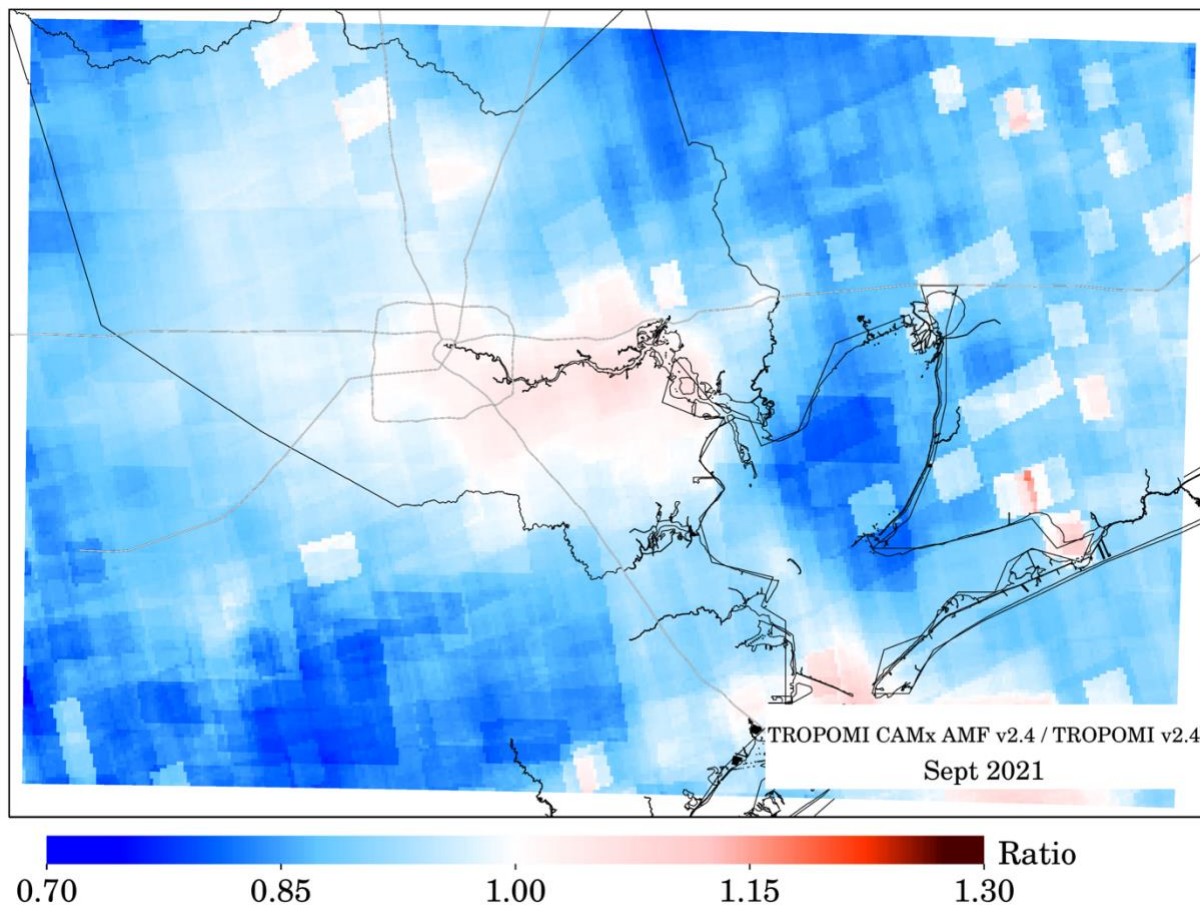

55 **Figure S1: Ratio of TROPOMI NO<sub>2</sub> columns during September 2021 with the new CAMx AMF compared to the operational AMF.**



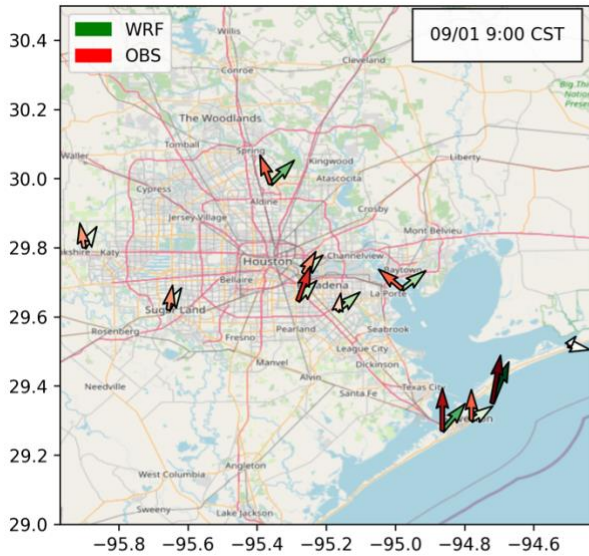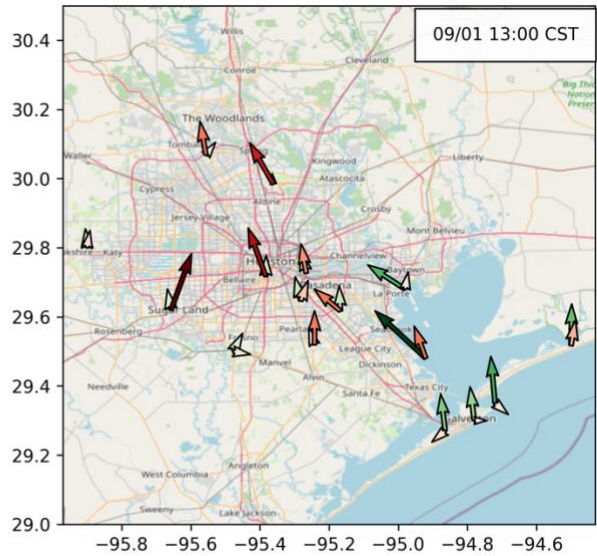

Figure S2: Comparison of observed (OBS) and simulated (WRF) wind at 9am and 1pm CST across sixteen ground-level monitors on September 1, 2021. © OpenStreetMap contributors 2023. Distributed under the Open Data Commons Open Database License (ODbL) v1.0.

60

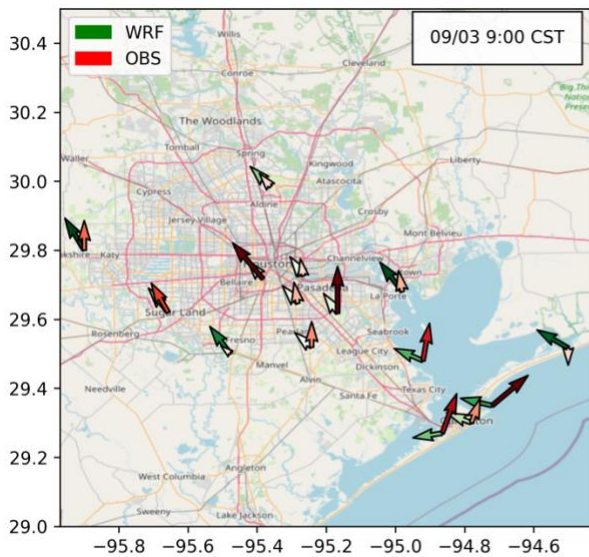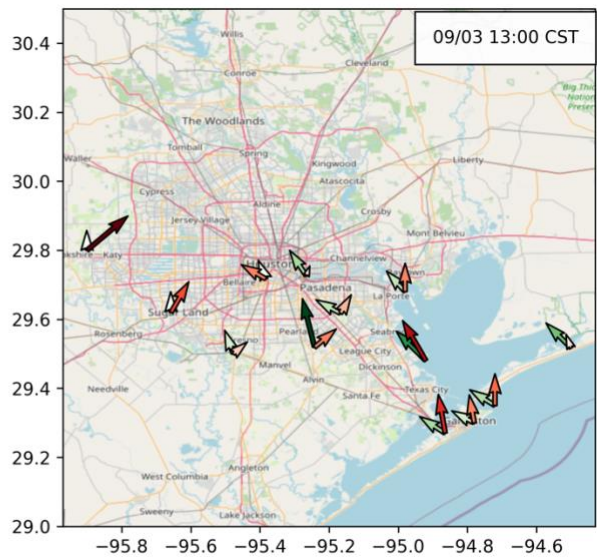

Figure S3: Comparison of observed (OBS) and simulated (WRF) wind at 9am and 1pm CST across sixteen ground-level monitors on September 3, 2021. © OpenStreetMap contributors 2023. Distributed under the Open Data Commons Open Database License (ODbL) v1.0.

65

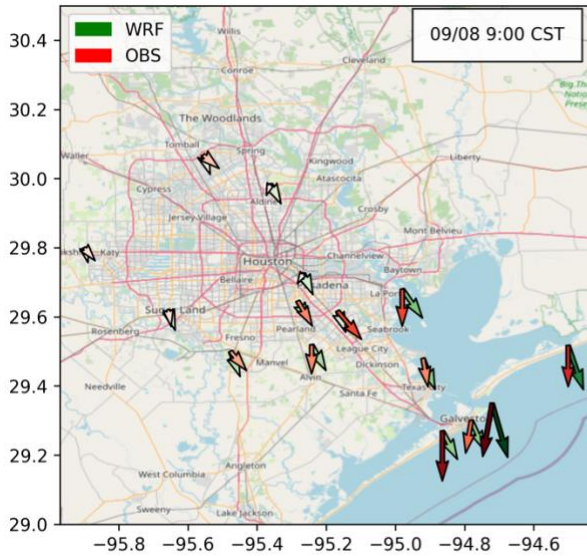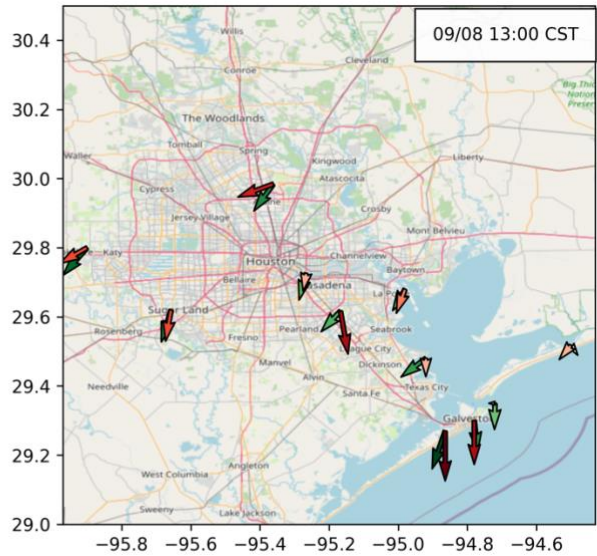

70 **Figure S4: Comparison of observed (OBS) and simulated (WRF) wind at 9am and 1pm CST across sixteen ground-level monitors on September 8, 2021. © OpenStreetMap contributors 2023. Distributed under the Open Data Commons Open Database License (ODbL) v1.0.**

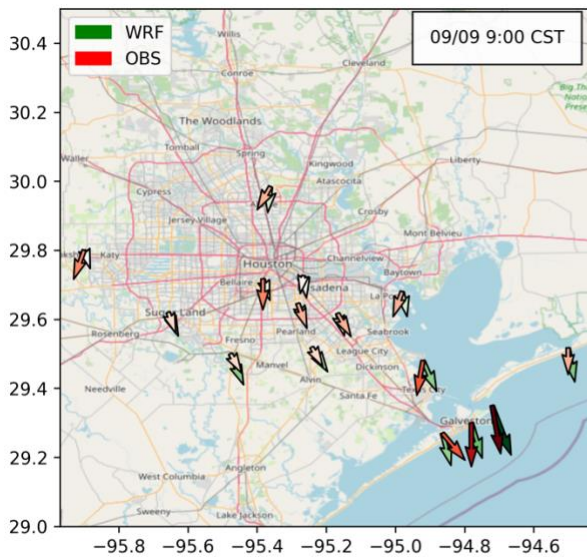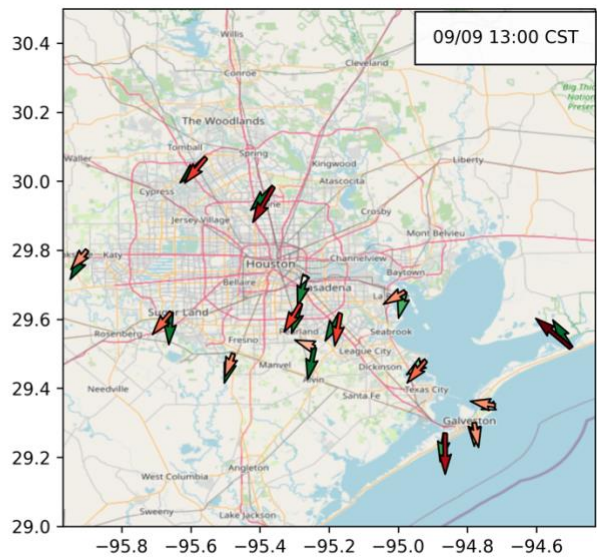

75 **Figure S5: Comparison of observed (OBS) and simulated (WRF) wind at 9am and 1pm CST across sixteen ground-level monitors on September 9, 2021. © OpenStreetMap contributors 2023. Distributed under the Open Data Commons Open Database License (ODbL) v1.0.**



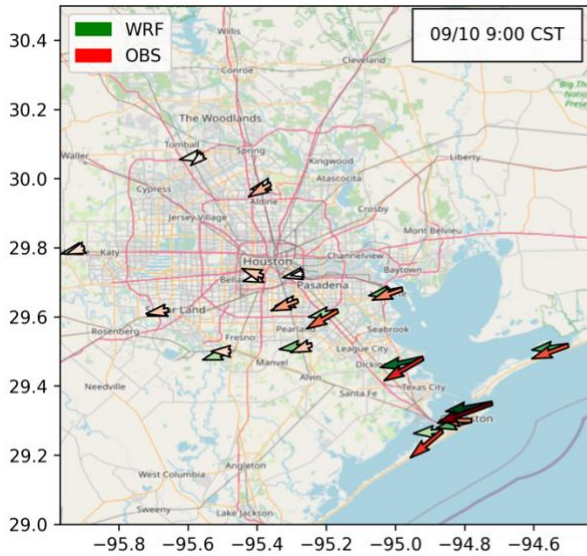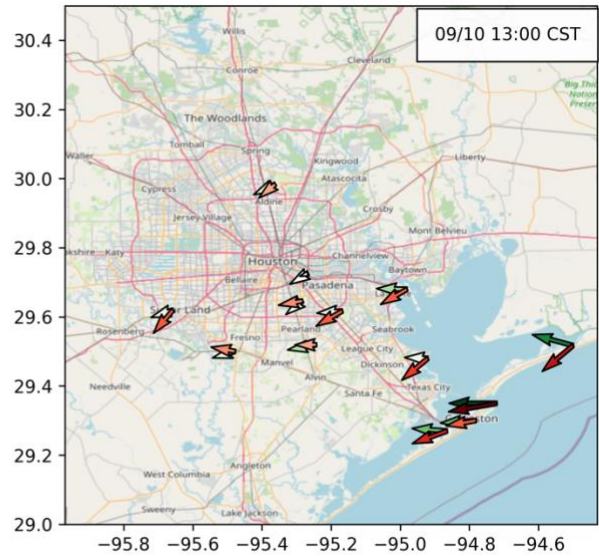

80

**Figure S6: Comparison of observed (OBS) and simulated (WRF) wind at 9am and 1pm CST across sixteen ground-level monitors on September 10, 2021. © OpenStreetMap contributors 2023. Distributed under the Open Data Commons Open Database License (ODbL) v1.0.**

85

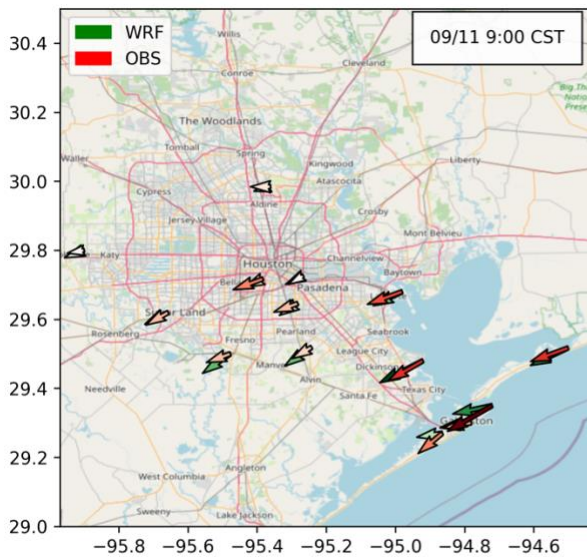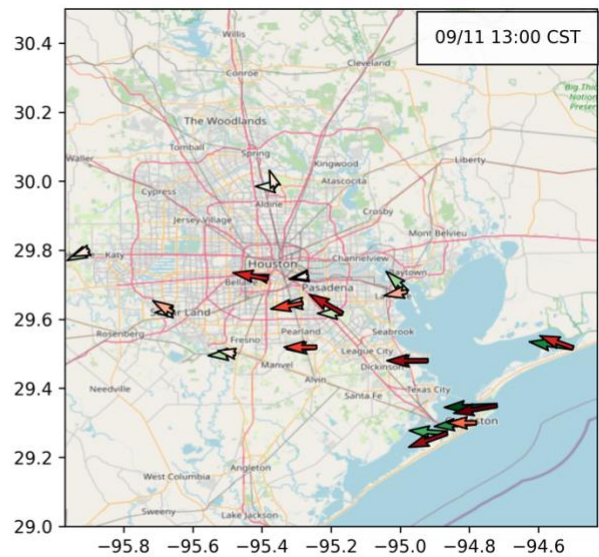

**Figure S7: Comparison of observed (OBS) and simulated (WRF) wind at 9am and 1pm CST across sixteen ground-level monitors on September 11, 2021. © OpenStreetMap contributors 2023. Distributed under the Open Data Commons Open Database License (ODbL) v1.0.**

90

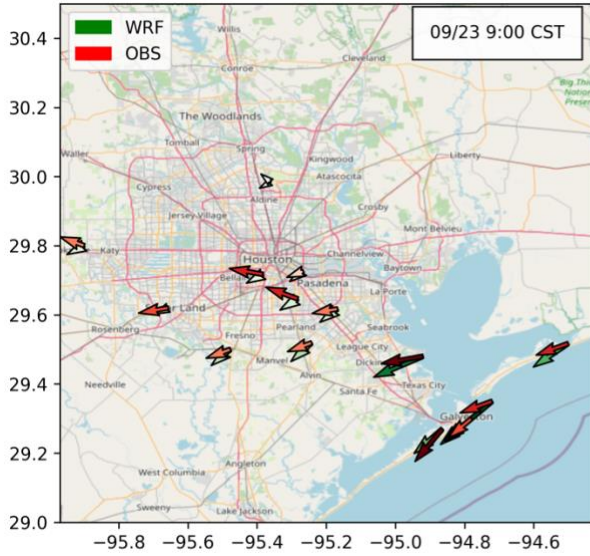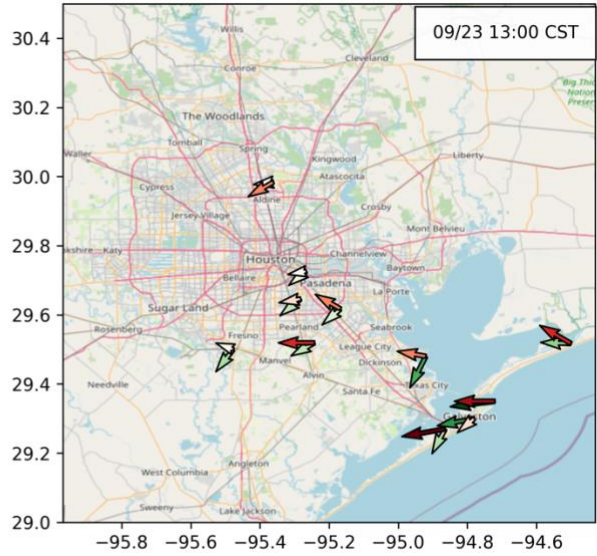

Figure S8: Comparison of observed (OBS) and simulated (WRF) wind at 9am and 1pm CST across sixteen ground-level monitors on September 23, 2021. © OpenStreetMap contributors 2023. Distributed under the Open Data Commons Open Database License (ODbL) v1.0.

95

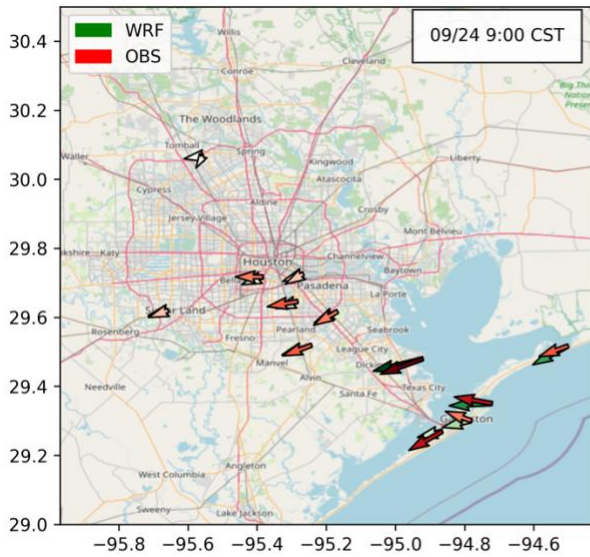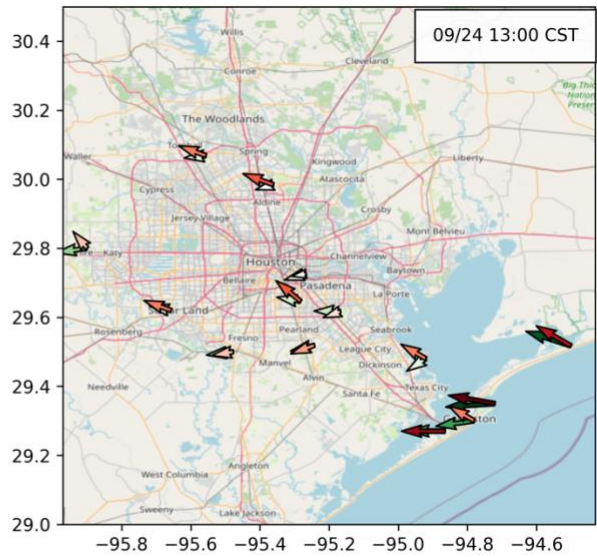

Figure S9: Comparison of observed (OBS) and simulated (WRF) wind at 9am and 1pm CST across sixteen ground-level monitors on September 24, 2021. © OpenStreetMap contributors 2023. Distributed under the Open Data Commons Open Database License (ODbL) v1.0.

100



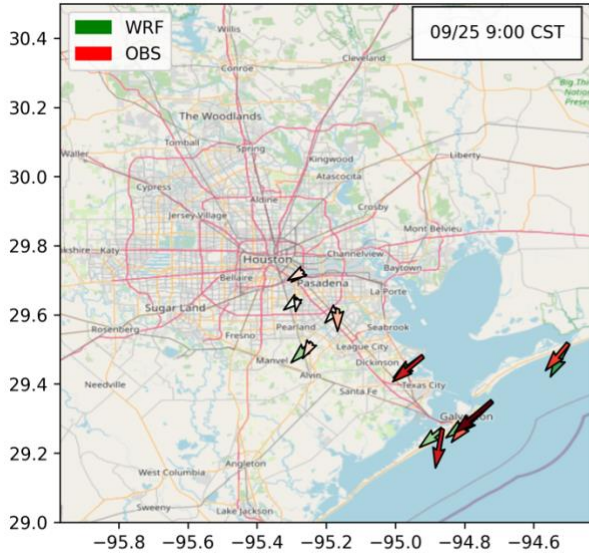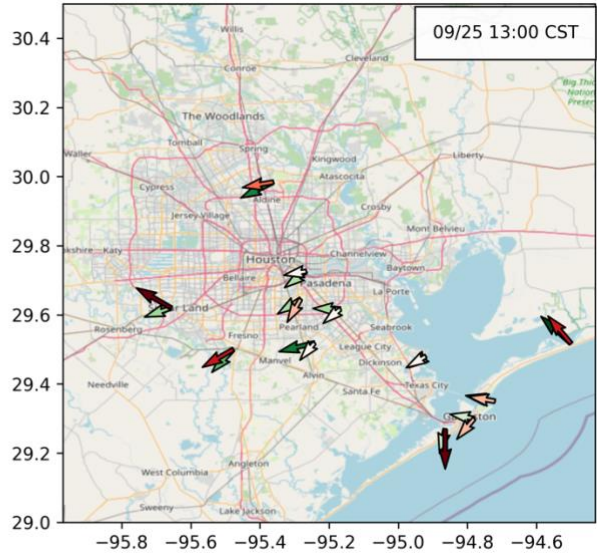

105 **Figure S10: Comparison of observed (OBS) and simulated (WRF) wind at 9am and 1pm CST across sixteen ground-level monitors on September 25, 2021. © OpenStreetMap contributors 2023. Distributed under the Open Data Commons Open Database License (ODbL) v1.0.**

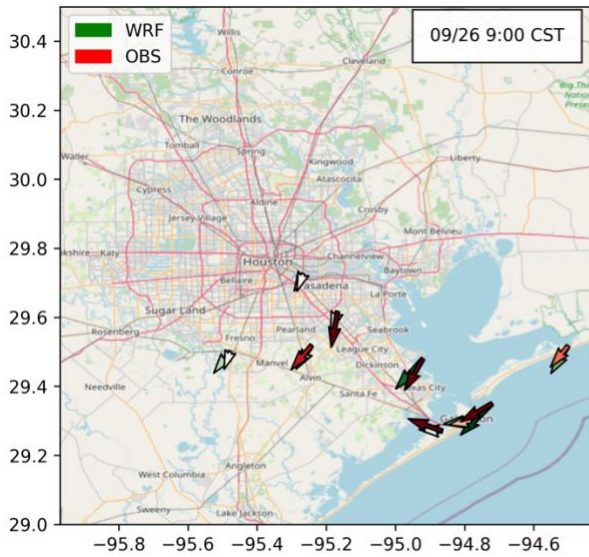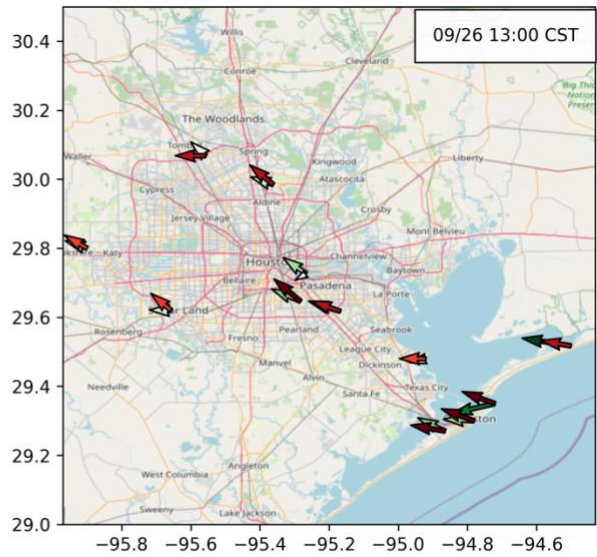

110 **Figure S11: Comparison of observed (OBS) and simulated (WRF) wind at 9am and 1pm CST across sixteen ground-level monitors on September 26, 2021. © OpenStreetMap contributors 2023. Distributed under the Open Data Commons Open Database License (ODbL) v1.0.**

115

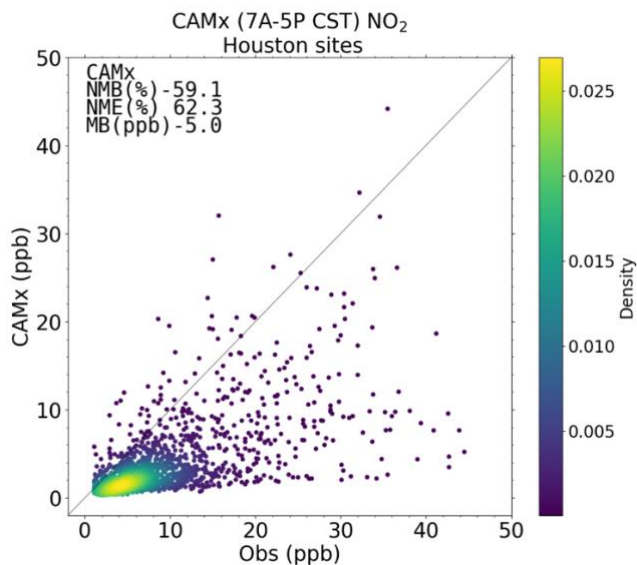

120 **Figure S12: Hourly CAMx (7 AM-5 PM CST) surface NO<sub>2</sub> plotted against observed surface NO<sub>2</sub> across all TCEQ CAMS sites within Houston for all days with GCAS flight measurements during the August 30-September 27, 2021 modeling period.**

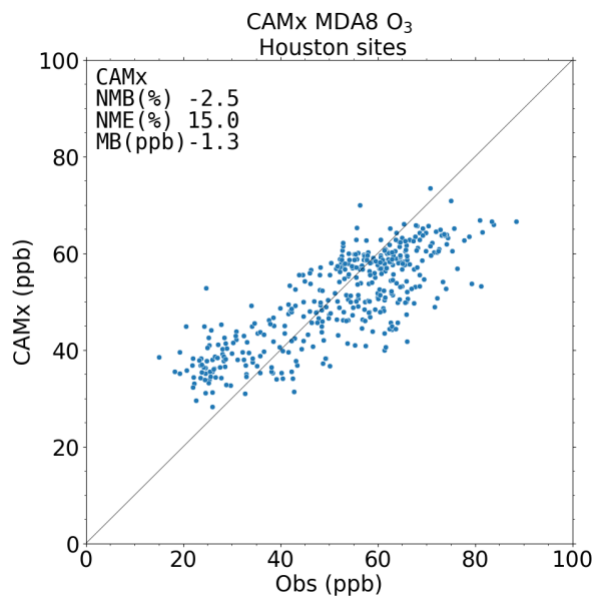

125 **Figure S13. MDA8 CAMx simulated and observed surface-level ozone across all TCEQ CAMS sites within Houston for all days with GCAS flight measurements during the August 30-September 27, 2021 modeling period.**

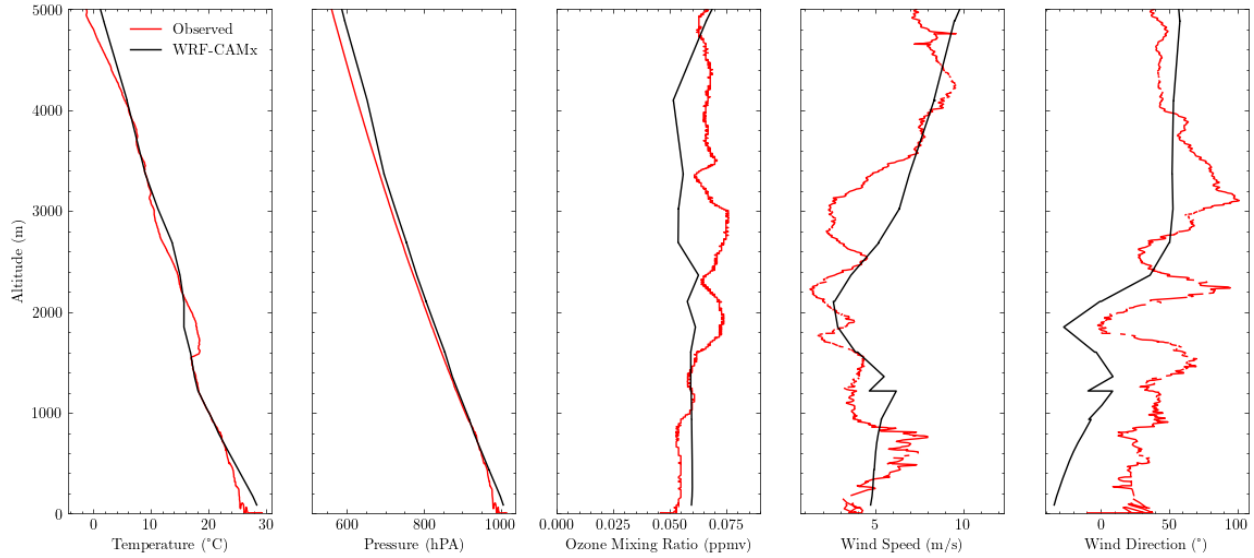

130 **Figure S14: Comparison between WRF-CAMx simulated meteorology and ozone mixing ratios and ozonesondes observations at 11 am on 9/8 at 29.324° N and 94.552° W (Gulf)**

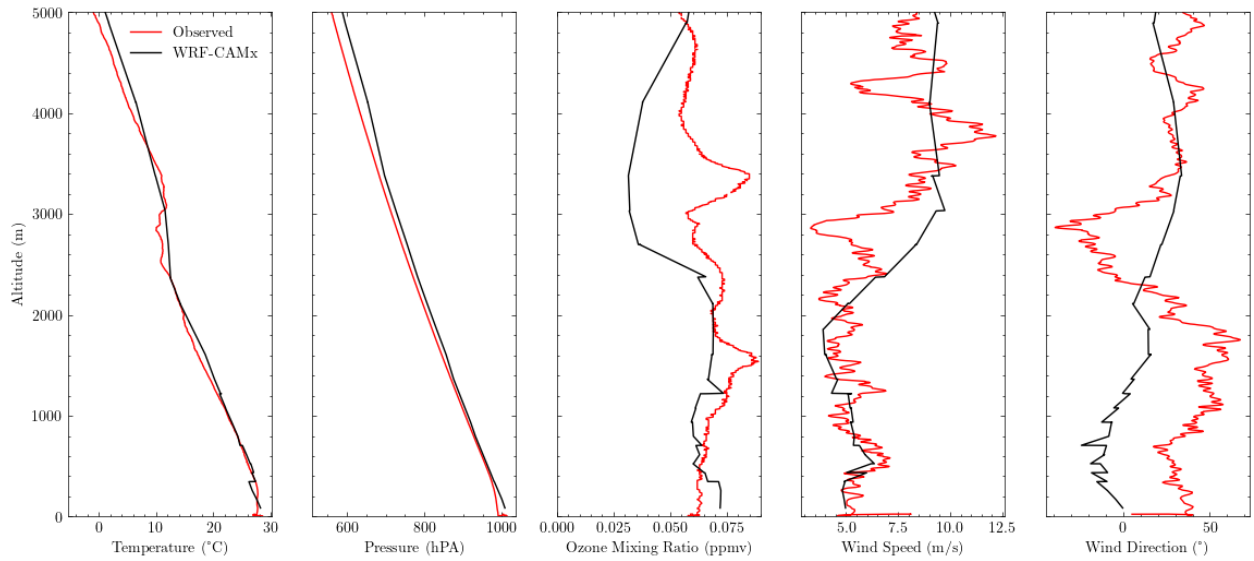

135 **Figure S15: Comparison between WRF-CAMx simulated meteorology and ozone mixing ratios and ozonesondes observations at 10am on 9/9 at 29.383° N and 94.831° W (Galveston Bay)**



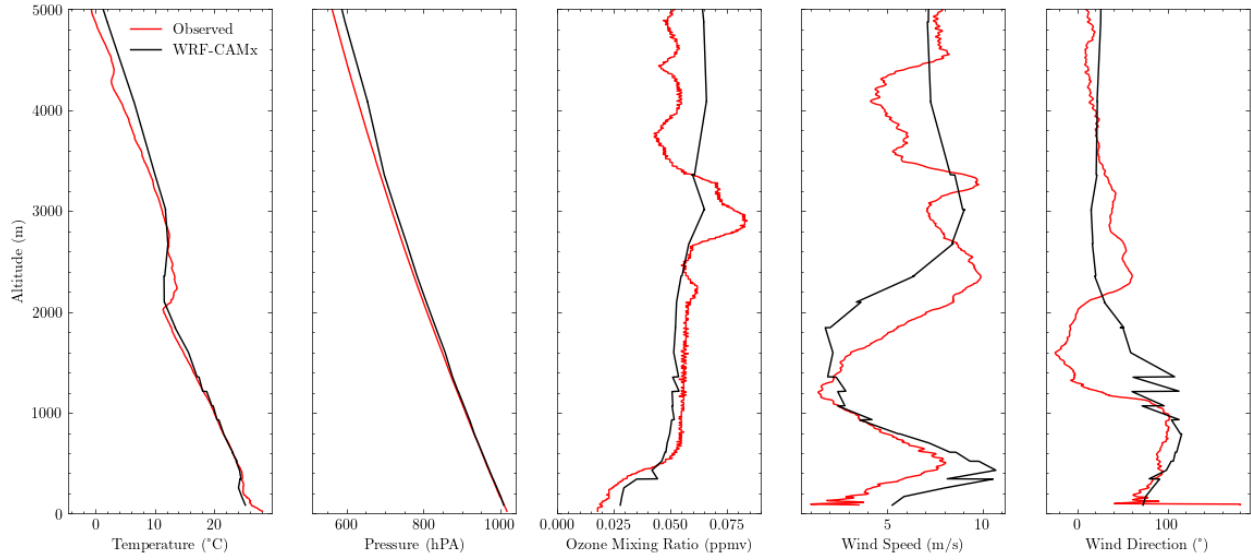

140

**Figure S16: Comparison between WRF-CAMx simulated meteorology and ozone mixing ratios and ozonesondes observations at 8am on 9/10 at 29.724° N and 95.339° W (University of Houston)**

145

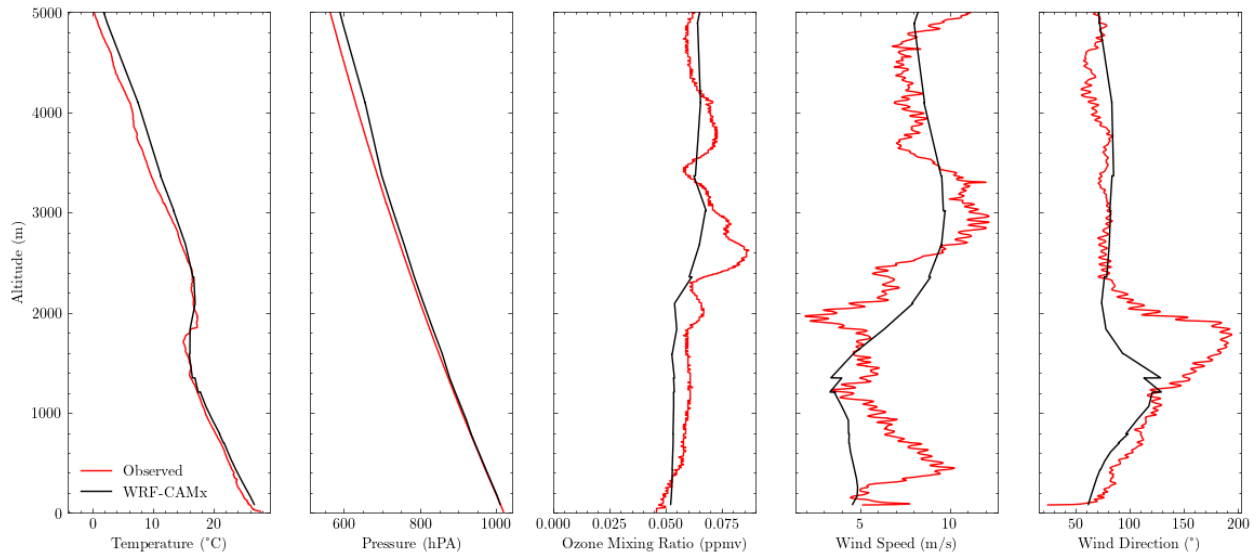

**Figure S17: Comparison between WRF-CAMx simulated meteorology and ozone mixing ratios and ozonesondes observations at 9am on 9/11 at 29.67° N and 95.06° W (LaPorte)**

150

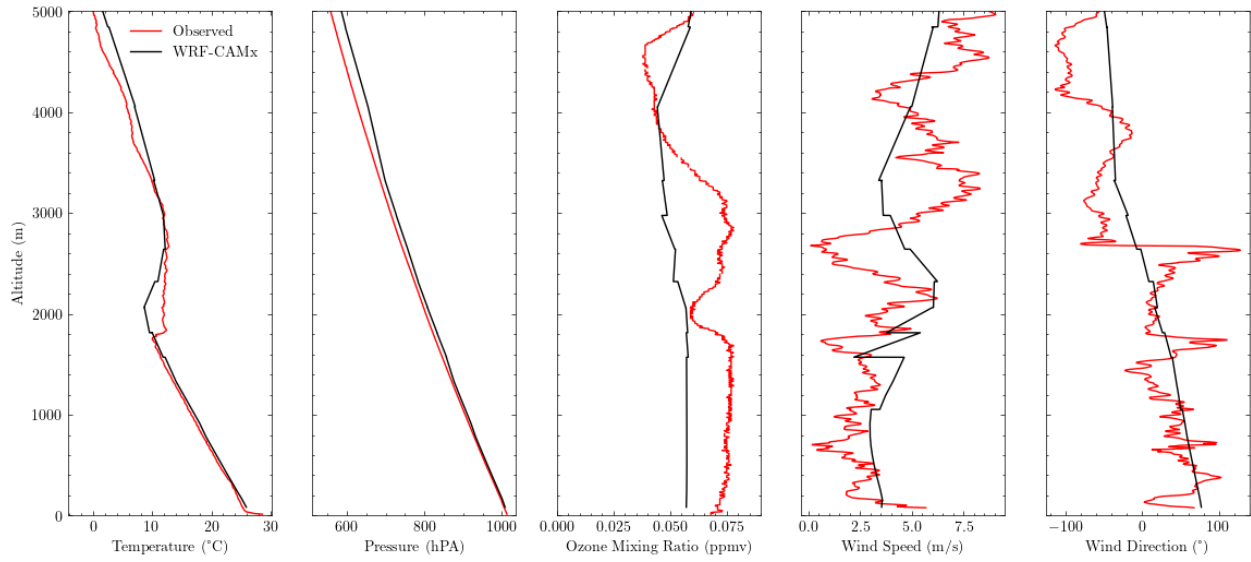

**Figure S18: Comparison between WRF-CAMx simulated meteorology and ozone mixing ratios and ozonesondes observations at 1pm on 9/23 at 29.546° N and 95.53° W (Houston SW Airport)**

155

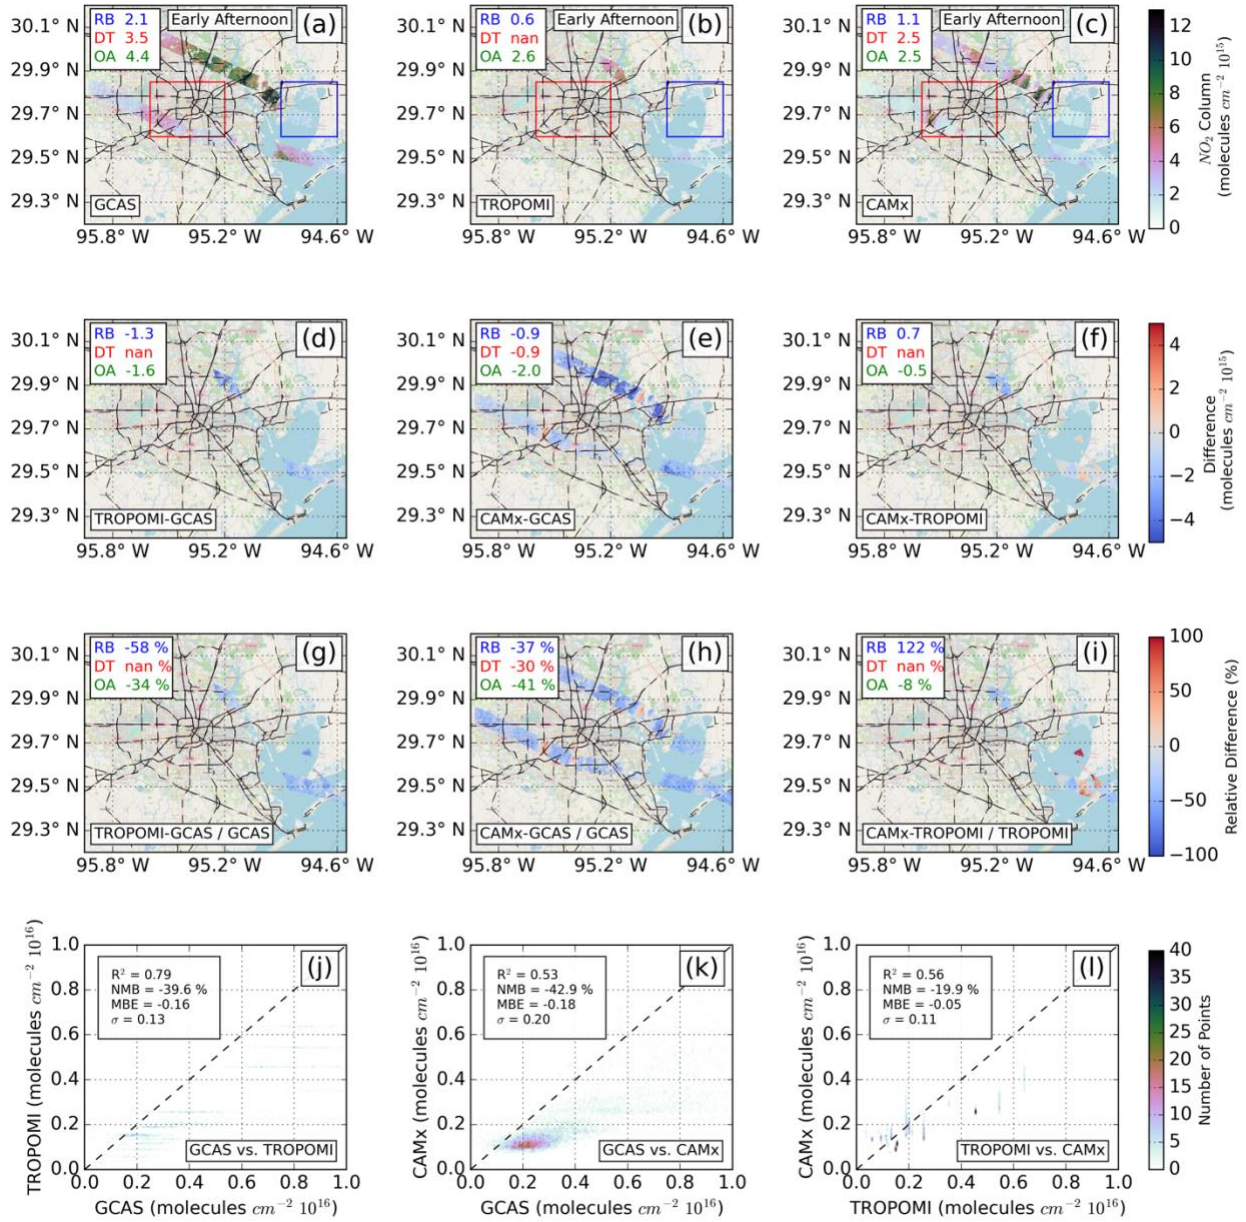

**Figure S19: Spatial comparison of GCAS, TROPOMI, and CAMx on September 1, 2021. © OpenStreetMap contributors 2023. Distributed under the Open Data Commons Open Database License (ODbL) v1.0.**

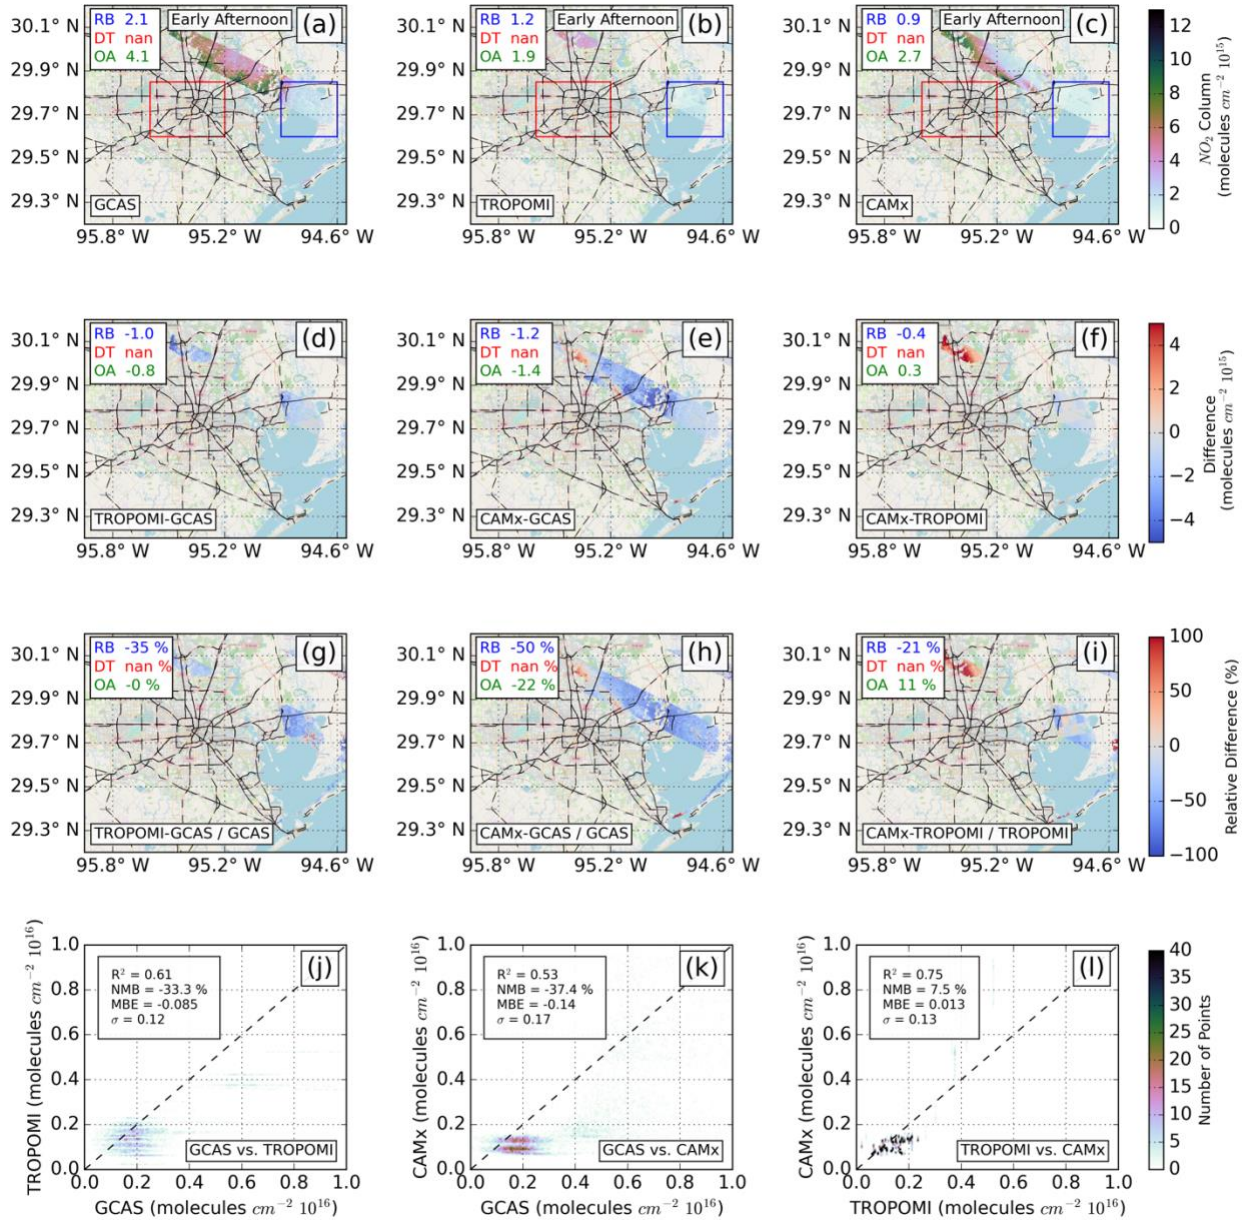

160 **Figure S20: Spatial comparison of GCAS, TROPOMI, and CAMx on September 3, 2021. © OpenStreetMap contributors 2023. Distributed under the Open Data Commons Open Database License (ODbL) v1.0.**



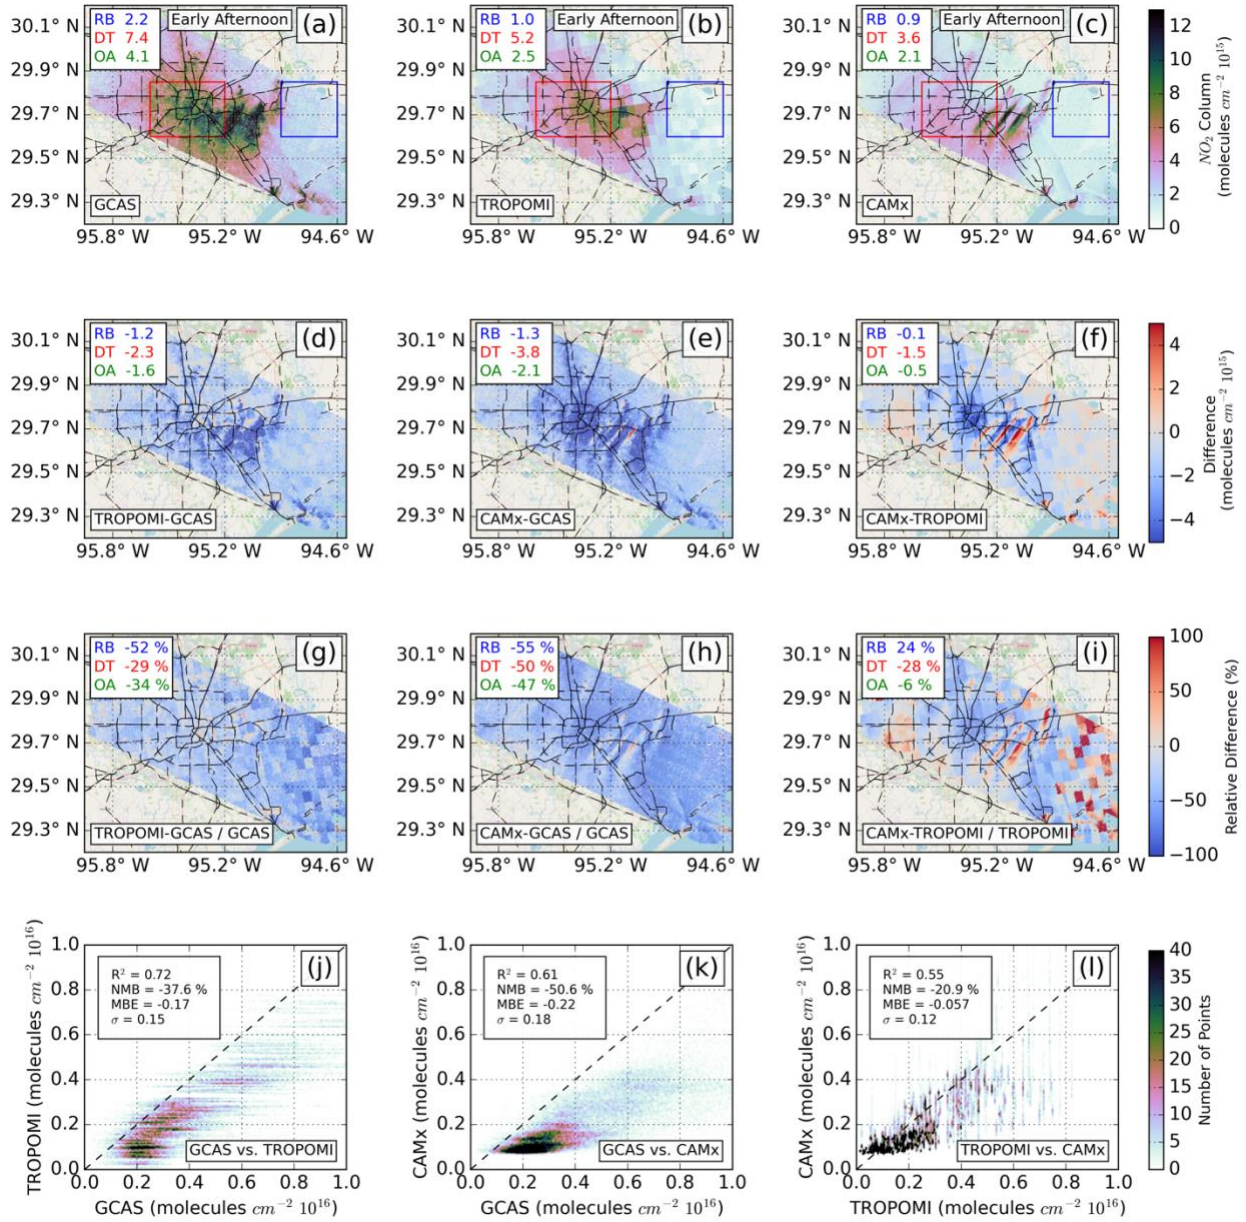

Figure S21: Spatial comparison of GCAS, TROPOMI, and CAMx on September 8, 2021. © OpenStreetMap contributors 2023. Distributed under the Open Data Commons Open Database License (ODbL) v1.0.



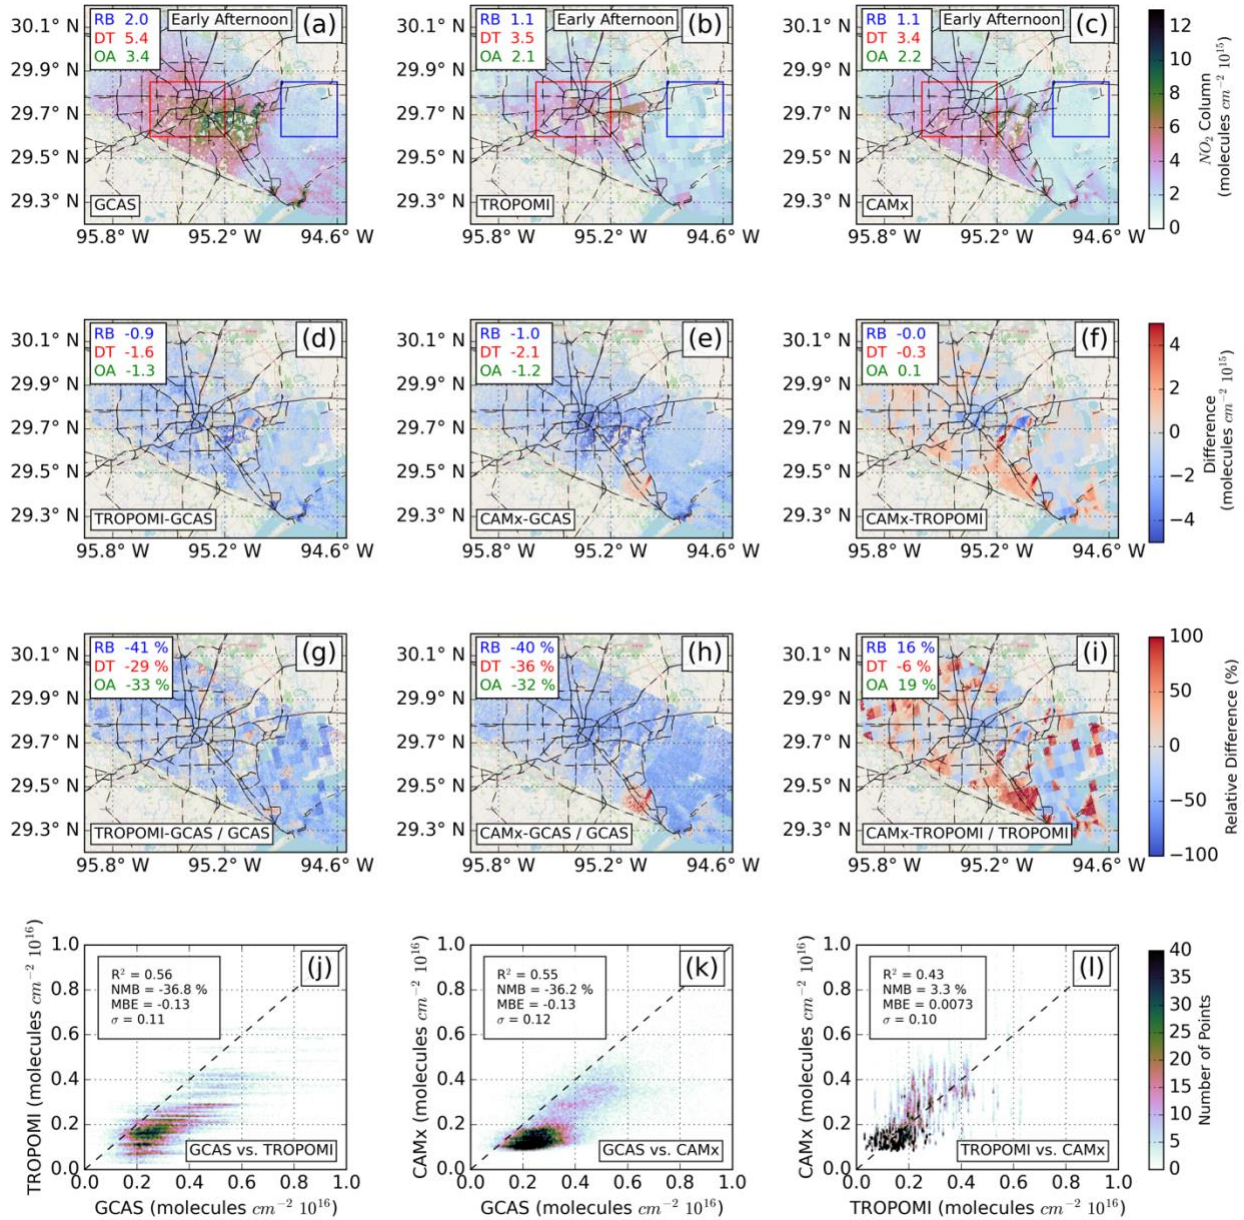

165

**Figure S22: Spatial comparison of GCAS, TROPOMI, and CAMx on September 9, 2021. © OpenStreetMap contributors 2023. Distributed under the Open Data Commons Open Database License (ODbL) v1.0.**

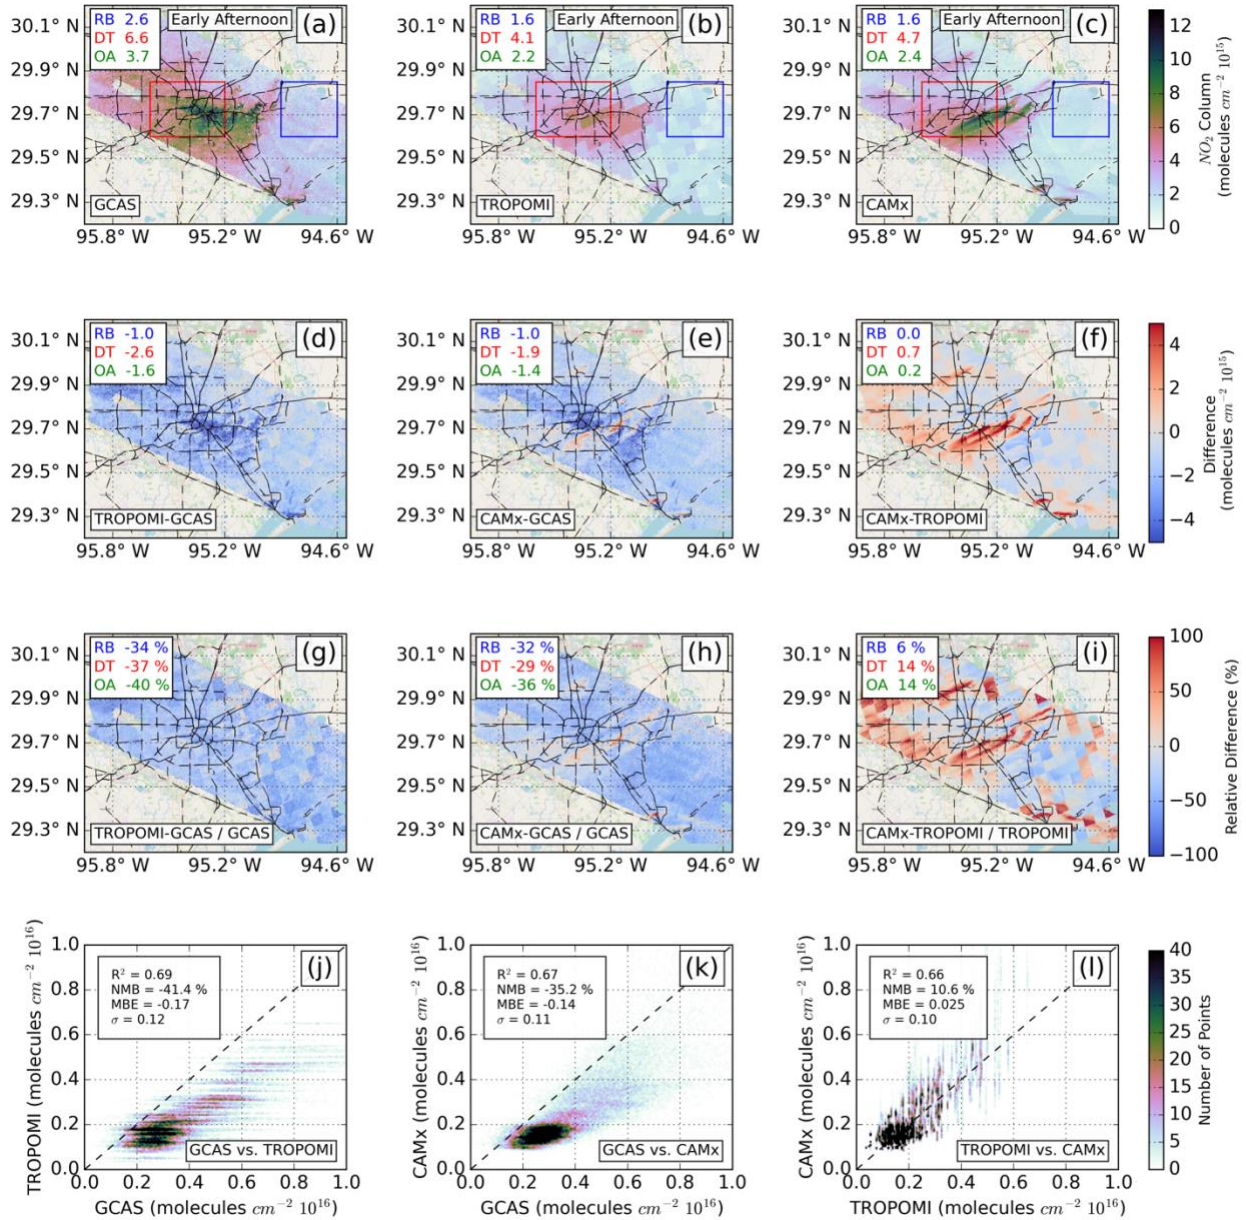

170 **Figure S23: Spatial comparison of GCAS, TROPOMI, and CAMx on September 10, 2021. © OpenStreetMap contributors 2023. Distributed under the Open Data Commons Open Database License (ODbL) v1.0.**



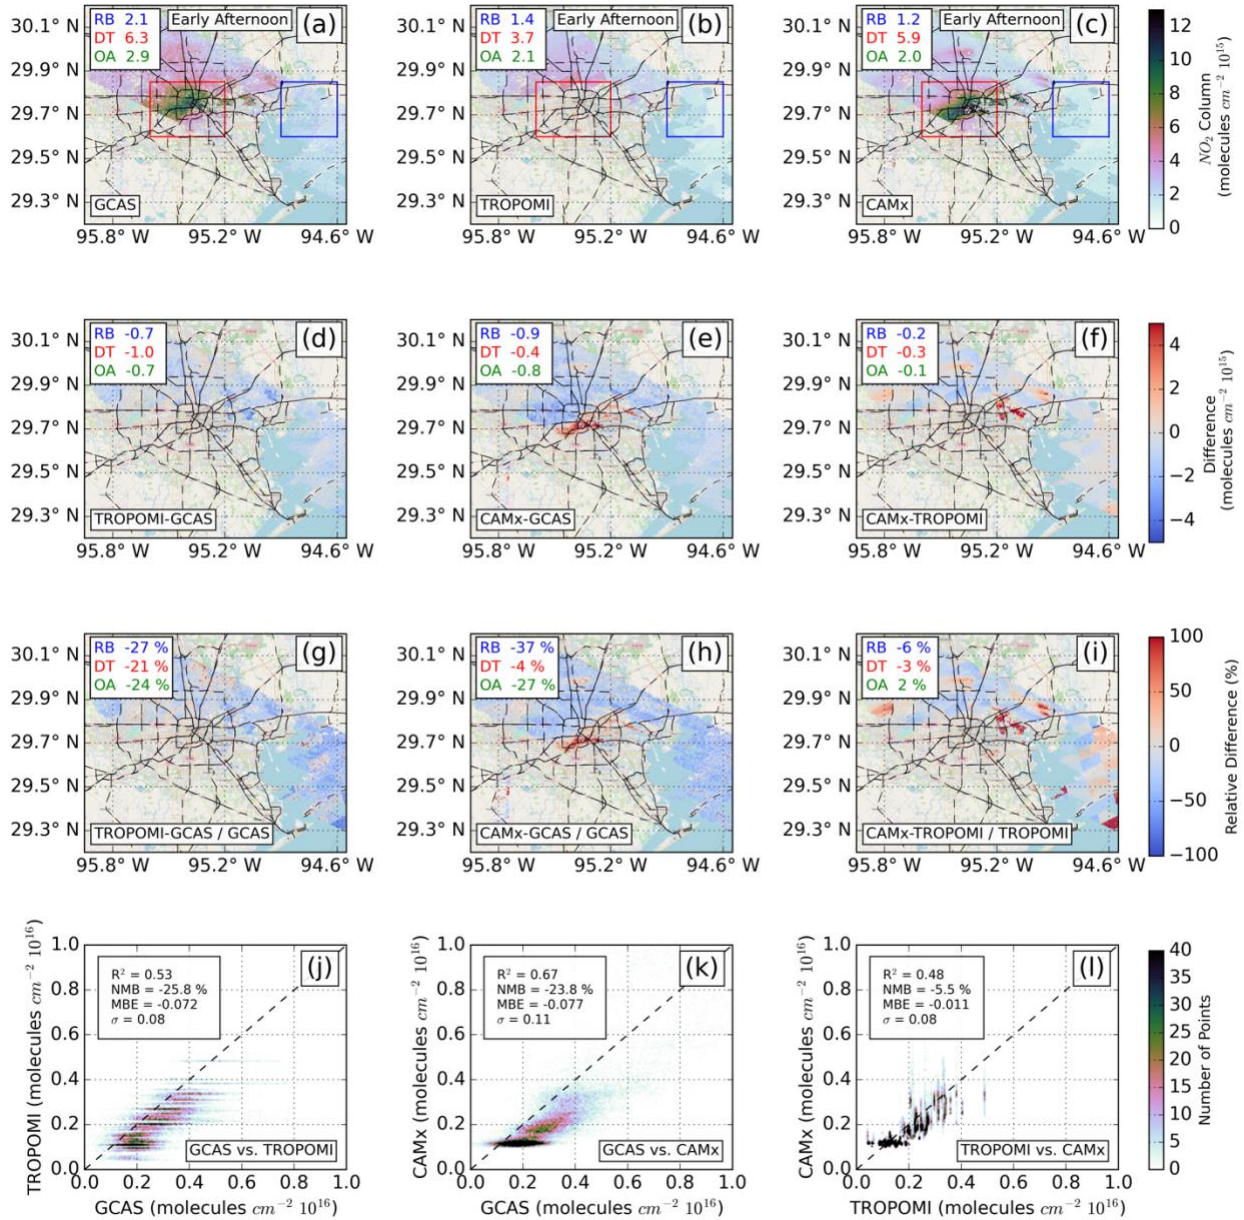

Figure S24: Spatial comparison of GCAS, TROPOMI, and CAMx on September 11, 2021. © OpenStreetMap contributors 2023. Distributed under the Open Data Commons Open Database License (ODbL) v1.0.

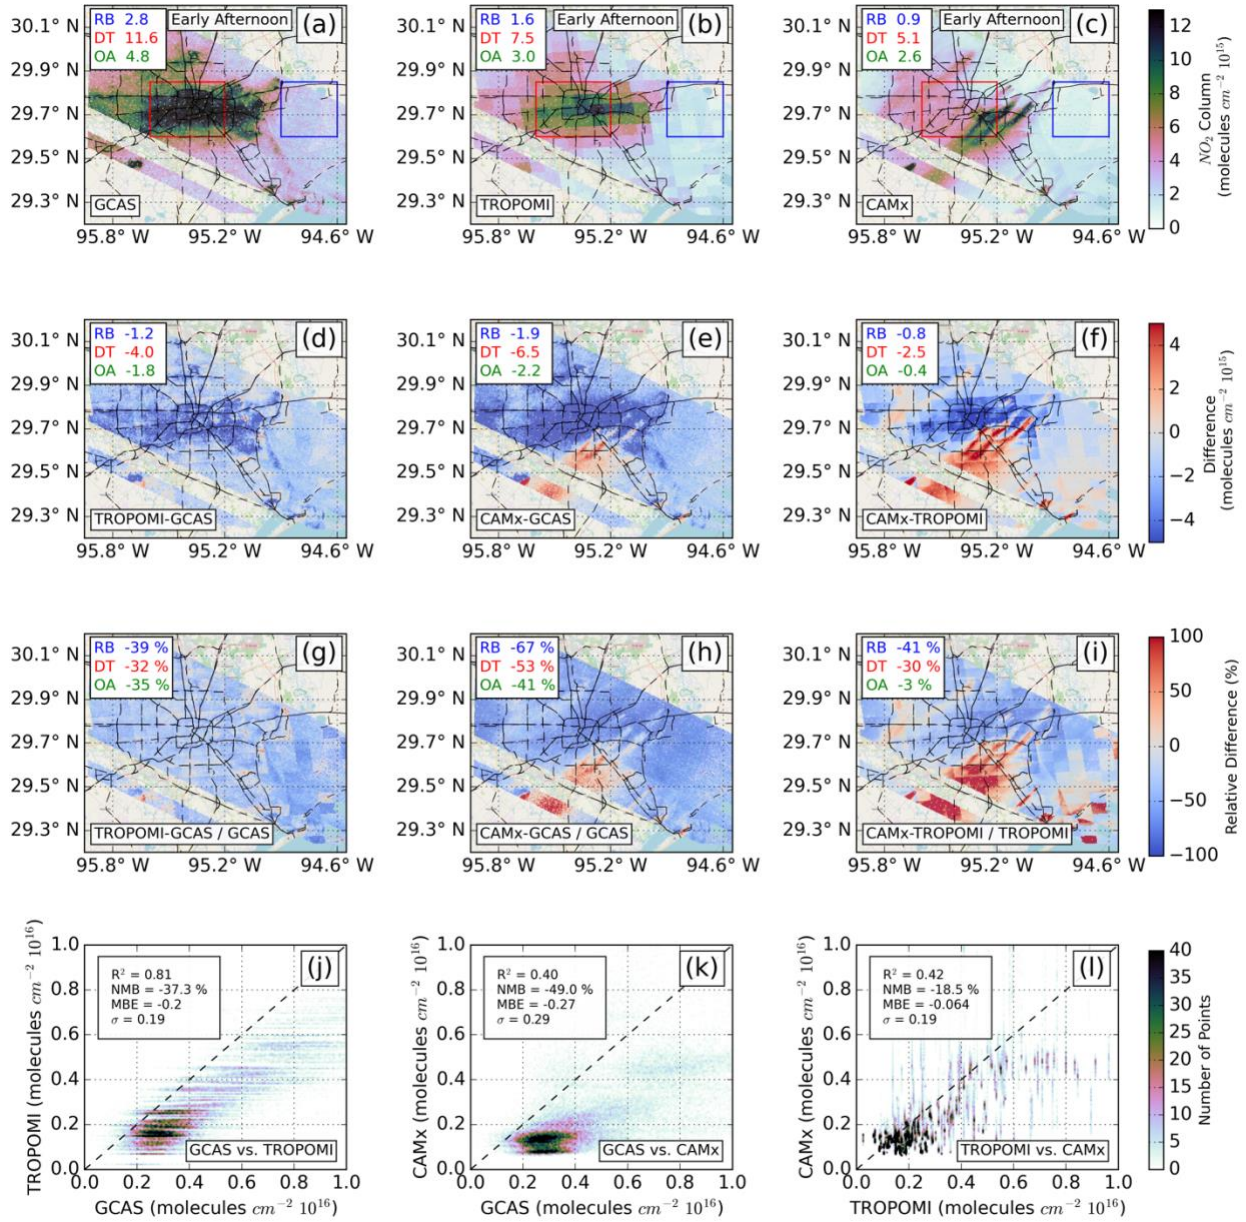

175 **Figure S25: Spatial comparison of GCAS, TROPOMI, and CAMx on September 23, 2021. © OpenStreetMap contributors 2023. Distributed under the Open Data Commons Open Database License (ODbL) v1.0.**



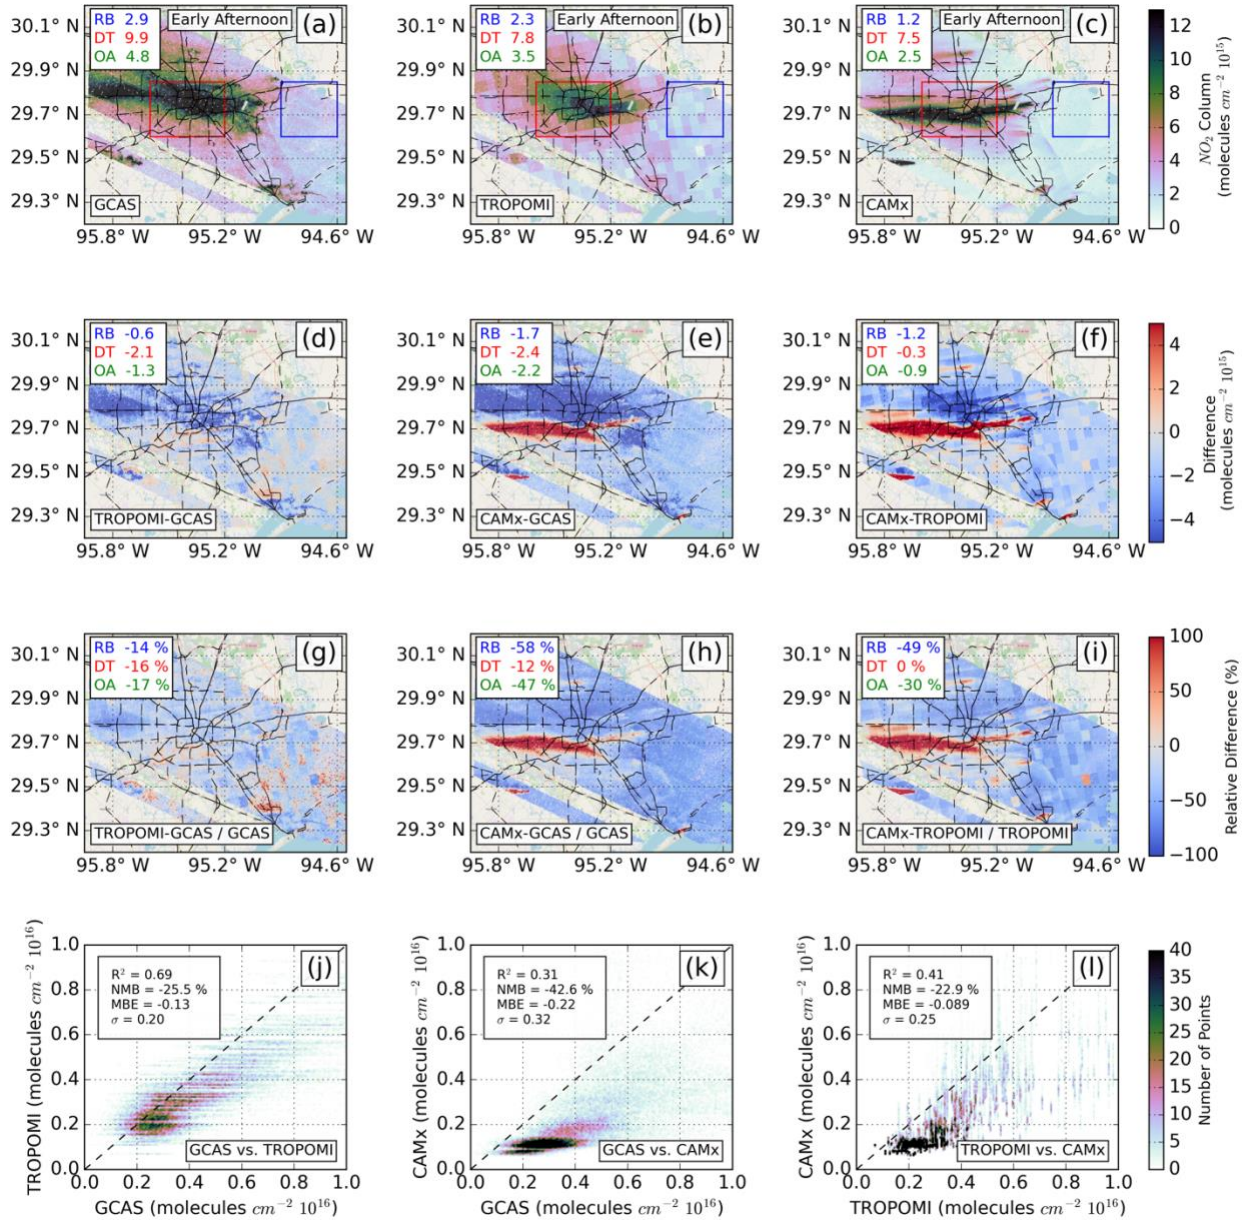

Figure S26: Spatial comparison of GCAS, TROPOMI, and CAMx on September 24, 2021. © OpenStreetMap contributors 2023. Distributed under the Open Data Commons Open Database License (ODbL) v1.0.



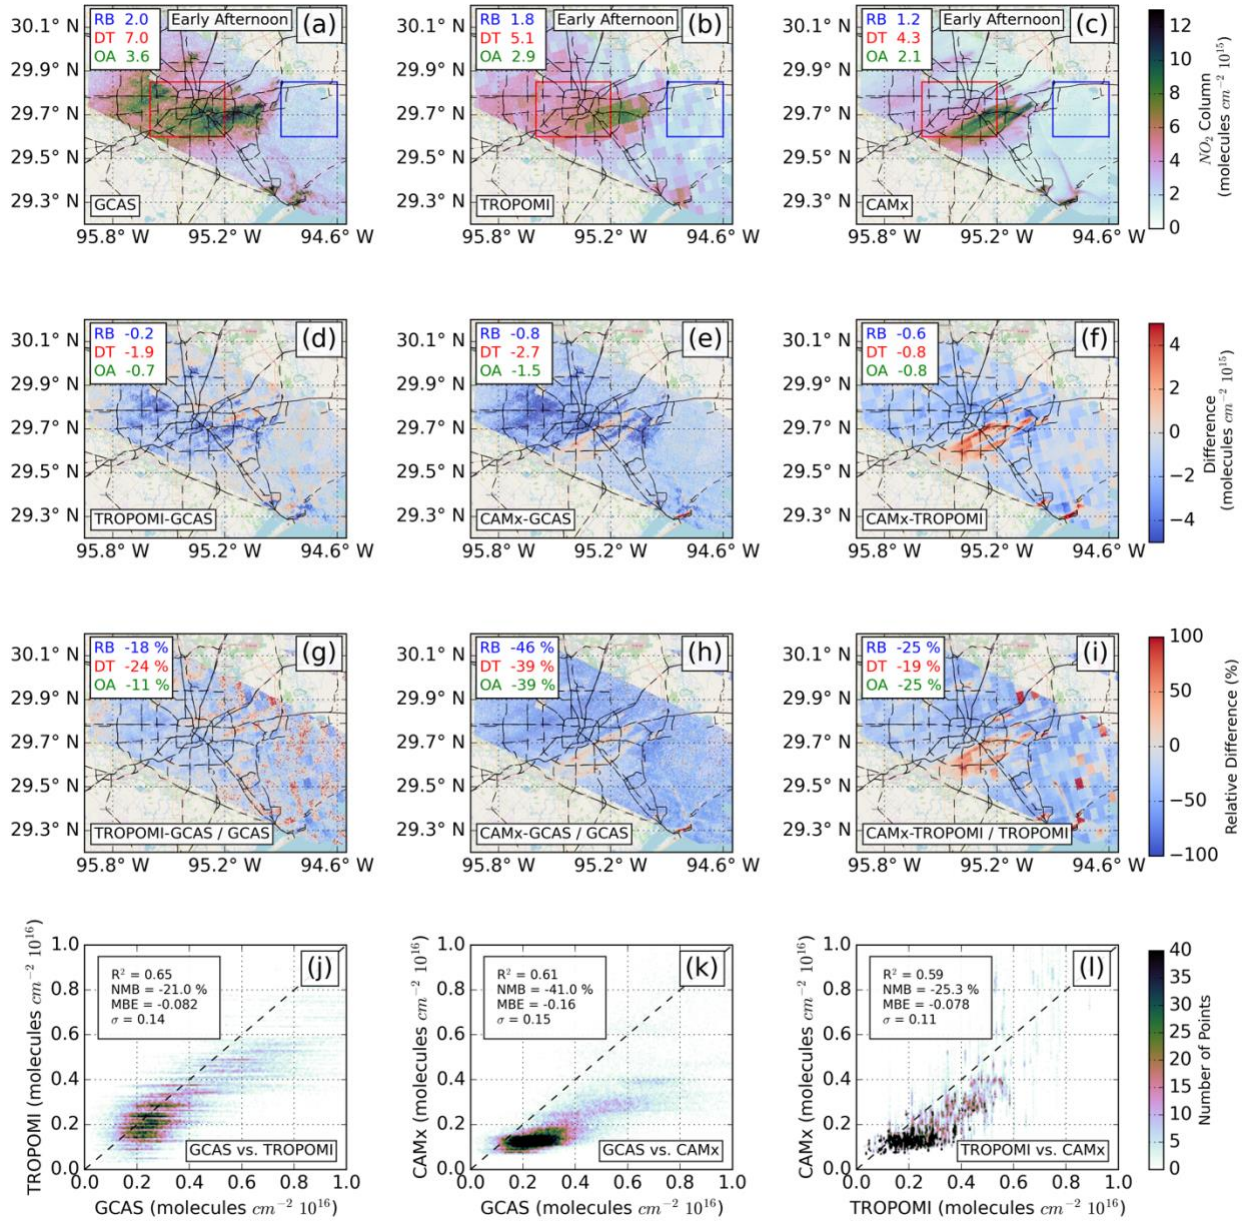

180

Figure S27: Spatial comparison of GCAS, TROPOMI, and CAMx on September 25, 2021. © OpenStreetMap contributors 2023. Distributed under the Open Data Commons Open Database License (ODbL) v1.0.

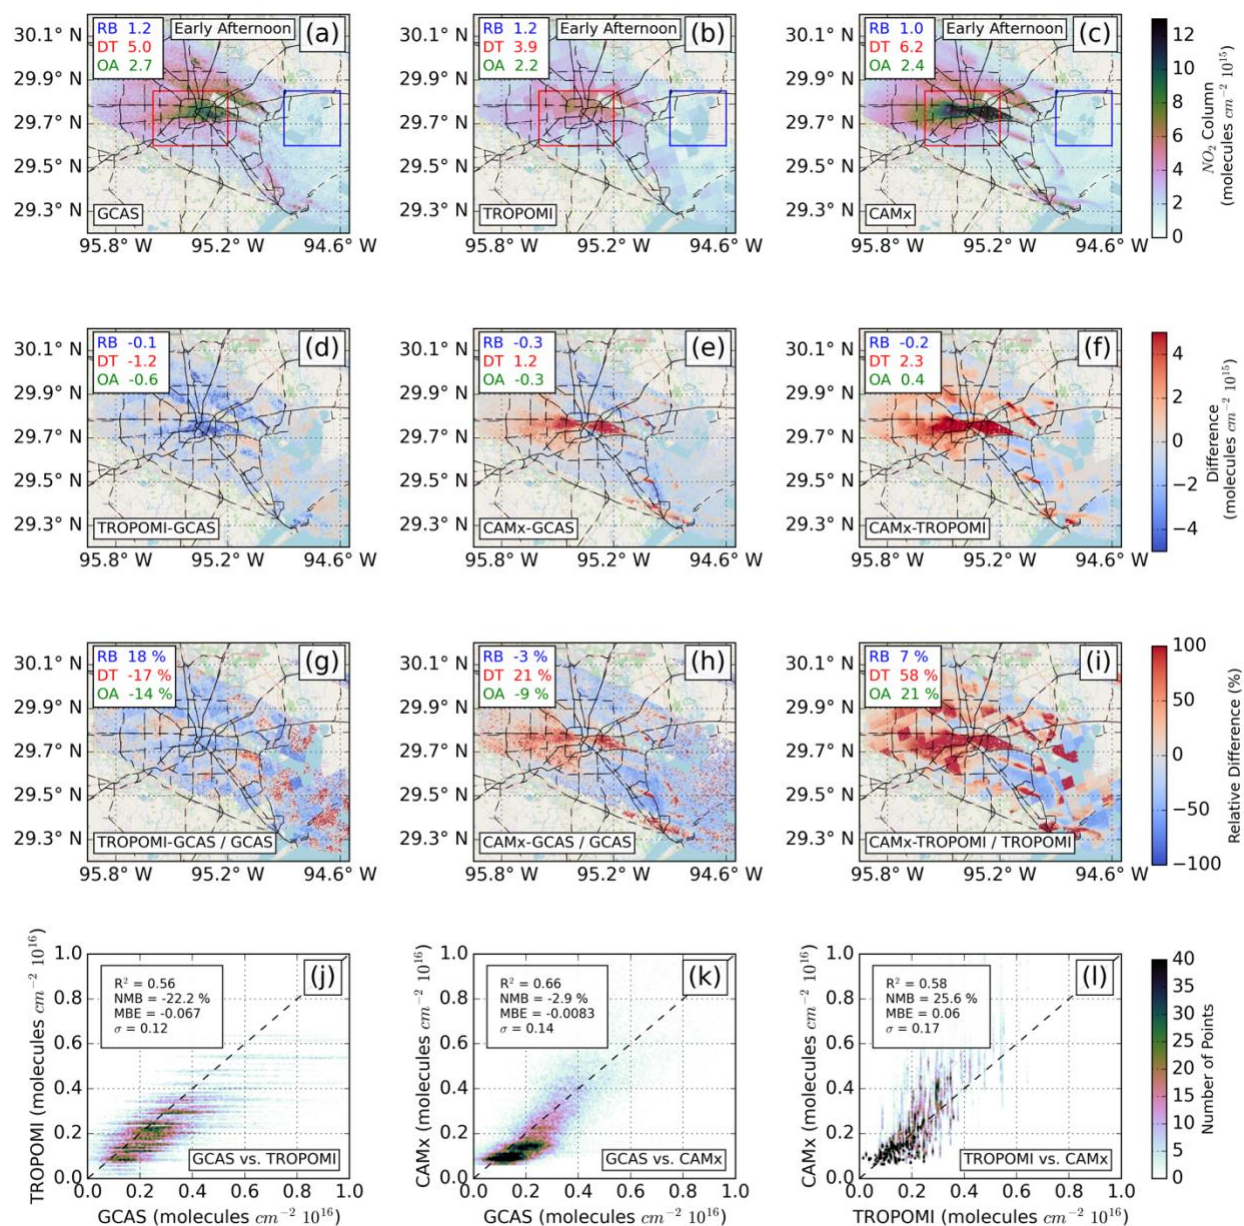

185

Figure S28: Spatial comparison of GCAS, TROPOMI, and CAMx on September 26, 2021. © OpenStreetMap contributors 2023. Distributed under the Open Data Commons Open Database License (ODbL) v1.0.



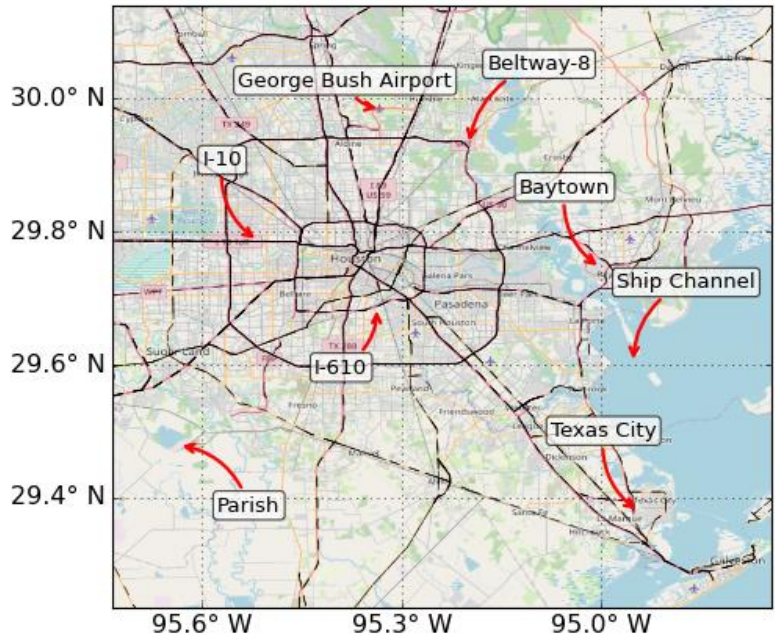

**Figure S29: Map of notable features in and around Houston. © OpenStreetMap contributors 2023. Distributed under the Open Data Commons Open Database License (ODbL) v1.0.**

190

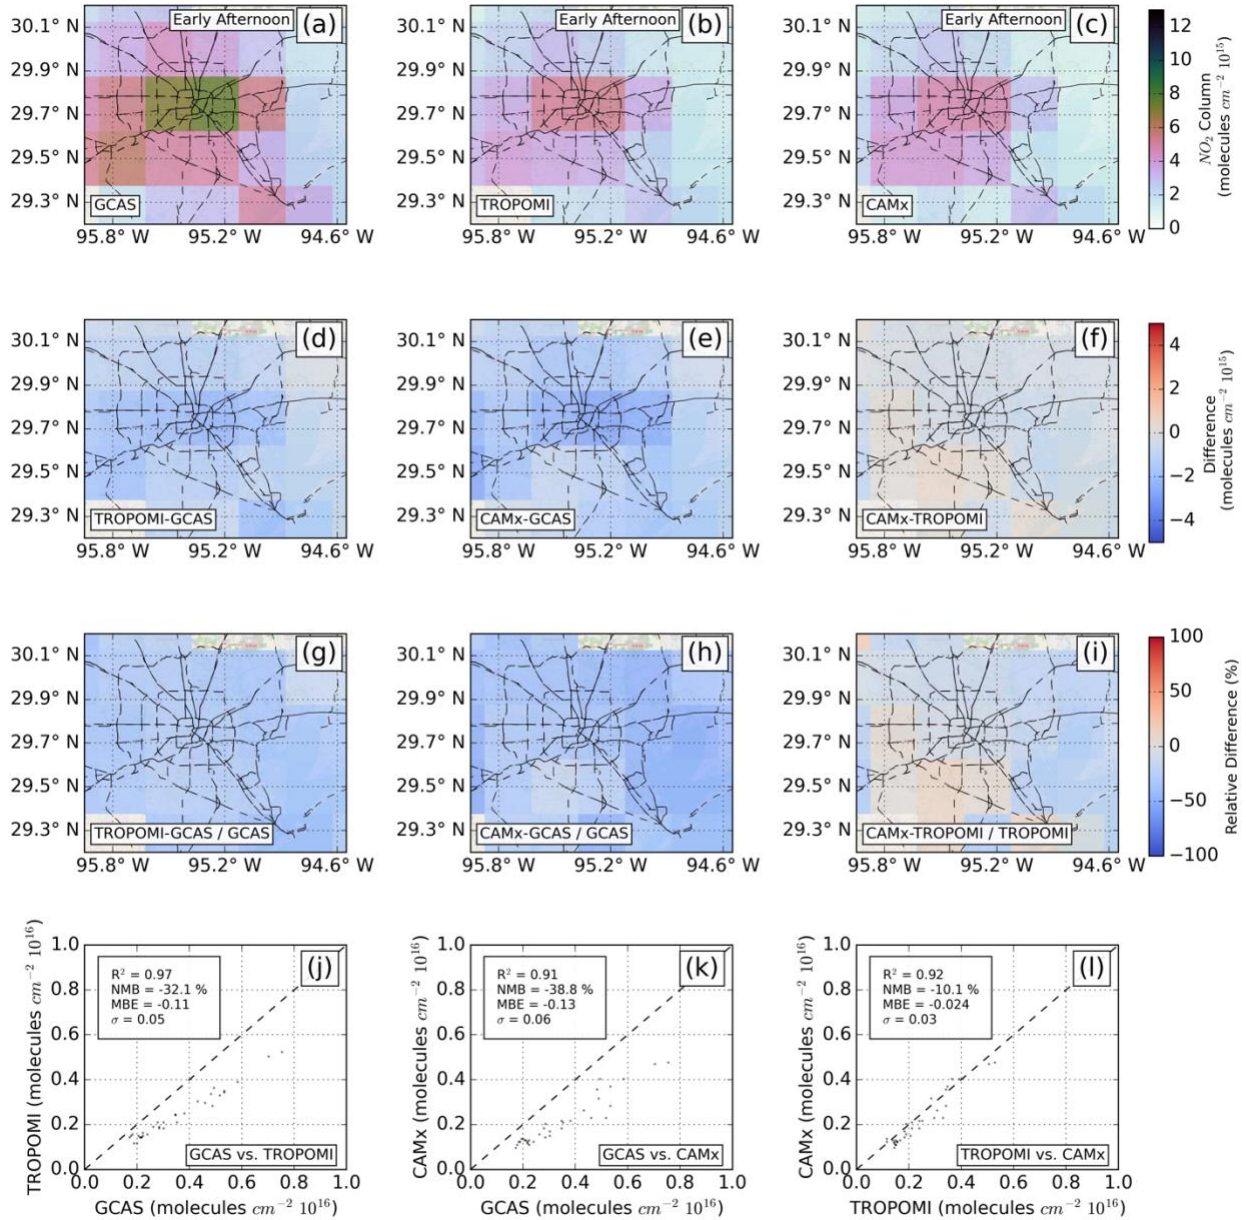

**Figure S30: Spatial comparison of GCAS, TROPOMI, and CAMx at the  $0.25^\circ \times 0.25^\circ$  resolution. © OpenStreetMap contributors 2023. Distributed under the Open Data Commons Open Database License (ODbL) v1.0.**



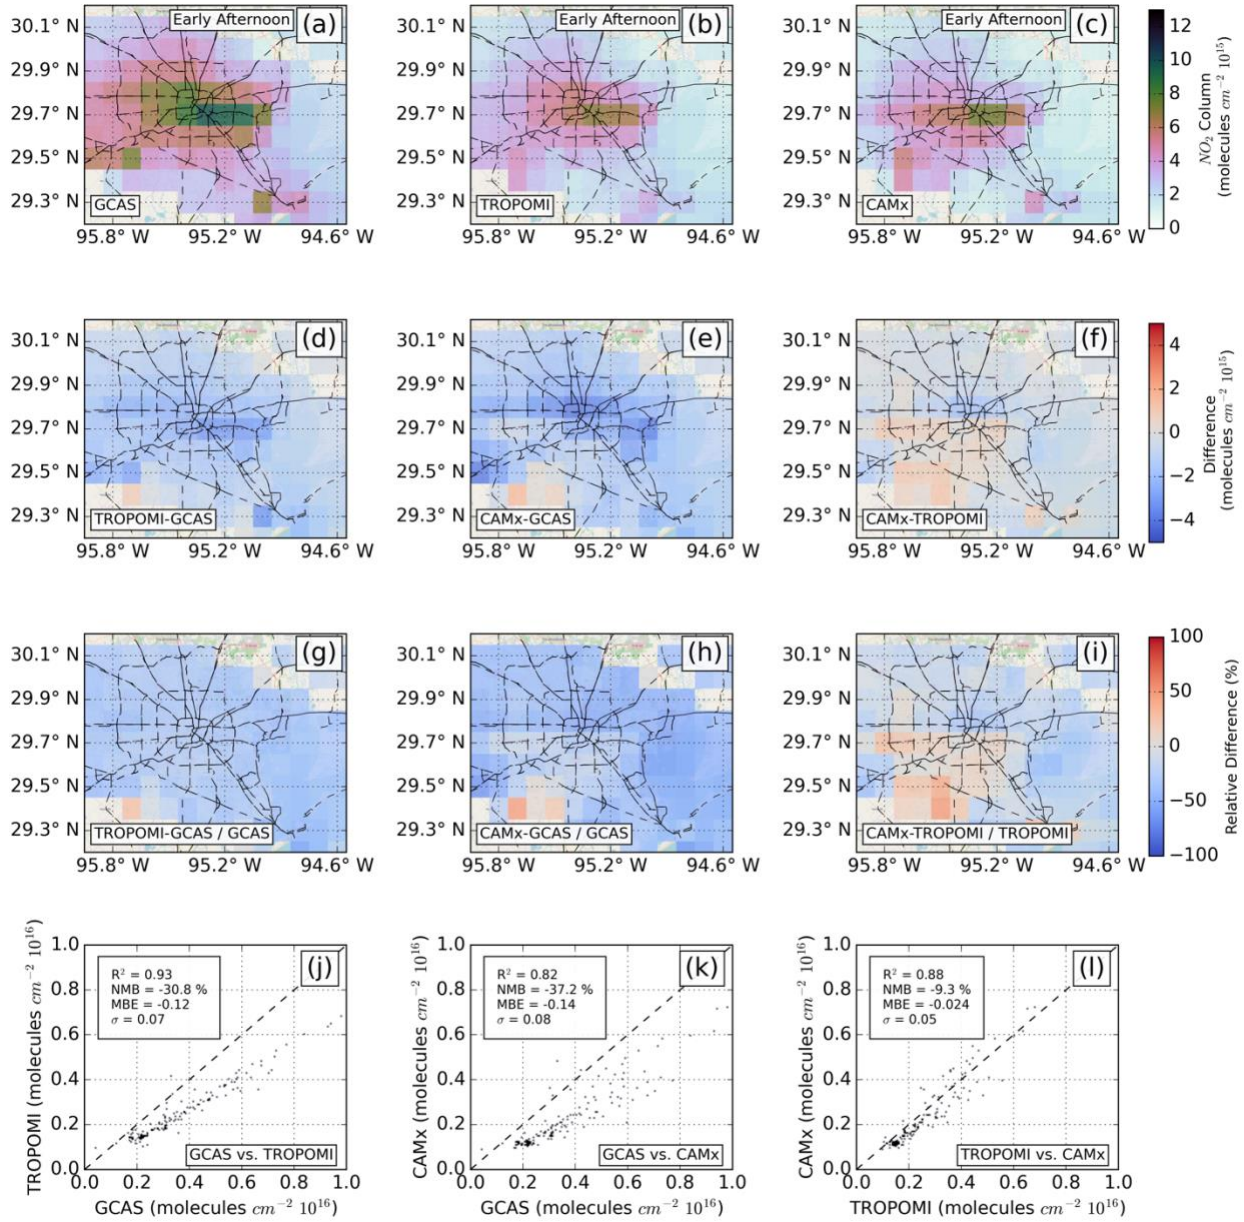

195

**Figure S31: Spatial comparison of GCAS, TROPOMI, and CAMx at the  $0.1^\circ \times 0.1^\circ$  resolution. © OpenStreetMap contributors 2023. Distributed under the Open Data Commons Open Database License (ODbL) v1.0.**

**Section S2. Equations for statistics referenced in the main text**

200

$$R^2 \text{ (Pearson-R squared): } R^2 = 1 - \frac{\sum(y_{obs} - y_{prd})^2}{\sum(y_{obs} - \bar{y}_{obs})^2}$$

$$\text{NMB (Normalized Mean Bias): } NMB = \frac{\sum(y_{prd} - y_{obs})}{\sum y_{obs}}$$

205

$$\text{MBE (Mean Bias Error): } MBE = \frac{1}{n} \sum (y_{prd} - y_{obs})$$

$$\text{MAE (Mean Absolute Error): } MAE = \frac{1}{n} \sum |y_{prd} - y_{obs}|$$

$$\sigma \text{ (Standard deviation of the residuals): } \sigma = \sqrt{\frac{\sum(r - \bar{r})^2}{n}}$$

210

$y_{obs}$ : Data from the dataset suspected to be closest to truth (Pandora > GCAS > TROPOMI > CAMx)

$y_{prd}$ : Data from the dataset suspected to be furthest from truth

$\bar{y}_{obs}$ : Mean of  $y_{obs}$

$r$ :  $y_{prd} - y_{obs}$

215

$\bar{r}$ : Mean of  $r$

$n$ : Number of observations

220
